# Supplementary material for: The impact of COVID-19 on menstrual cycle’s alterations, in relation to depression and sleep disturbances: a prospective observational study in a population of medical students
Source: PubMed Central journal article supplement (PMC10877769; doi:10.1186/s12905-024-02971-x), 2024-02-19
Supplement: 12905_2024_2971_MOESM1_ESM.pdf [file 12905_2024_2971_MOESM1_ESM.pdf]

IES-R TEST  
Supplementary

Table S1. relationship between the menstrual cycle and the impact of the pandemic as a traumatic event. A,B: relationship with the altered duration of the menstrual cycle; C: Amenorrhea; D: Change Weight; E: Premenstrual syndrome

| A                                                                                   |                     |                                    |                                     |        |
|-------------------------------------------------------------------------------------|---------------------|------------------------------------|-------------------------------------|--------|
| IN THE LAST YEAR ALTERATION OF MENSTRUAL CYCLE                                      |                     |                                    |                                     |        |
| PATIENTS n.293 (100%)                                                               | No<br>(183 / 62.5%) | Increase of interval<br>(73/24.9%) | Reduction of interval<br>(37/12.6%) | P      |
| 1.Any reminder brought back feelings about it                                       |                     |                                    |                                     |        |
| - none                                                                              | 15 (8.2%)           | 10 (13.7%)                         | 0                                   |        |
| -not much                                                                           | 47 (25.7%)          | 14 (19.2%)                         | 12 (32.4%)                          |        |
| -moderately                                                                         | 69 (37.7%)          | 15 (15.8 %)                        | 11(29.7%)                           |        |
| -enough                                                                             | 44 (24%)            | 25 (30.9%)                         | 12(32.4%)                           |        |
| -extremely                                                                          | 8 (4.4%)            | 9(12.3%)                           | 2 (5.4%)                            | 0.012* |
| 2.I had trouble staying asleep                                                      |                     |                                    |                                     |        |
| - none                                                                              | 58 (31.7%)          | 19 (26%)                           | 5(13.5%)                            |        |
| -not much                                                                           | 39 (21.3%)          | 8 (11%)                            | 8 (21.6%)                           |        |
| -moderately                                                                         | 30 (16.4%)          | 11 (15.1 %)                        | 9 (24.3%)                           |        |
| -enough                                                                             | 41 (22.4%)          | 20 (27.4%)                         | 10(27%)                             |        |
| -extremely                                                                          | 15 (8.2%)           | 15(20.5%)                          | 5 (13.5%)                           | 0.047* |
| 3.Other things kept making me think about it.                                       |                     |                                    |                                     |        |
| - none                                                                              | 25 (13.7%)          | 5 (6.8%)                           | 2(5.4%)                             |        |
| -not much                                                                           | 48 (26.2%)          | 18 (24.7%)                         | 7 (18.9%)                           |        |
| -moderately                                                                         | 66 (36.1%)          | 22 (30.1 %)                        | 15 (40.5%)                          |        |
| -enough                                                                             | 34 (18.6%)          | 21 (28.8%)                         | 11 (29.7%)                          |        |
| -extremely                                                                          | 10 (5.5%)           | 7(9.6%)                            | 2 (5.4%)                            | 0.283  |
| 4.I felt irritable and angry                                                        |                     |                                    |                                     |        |
| - none                                                                              | 10(5.5%)            | 2(2.7%)                            | 1 (2.7%)                            |        |
| -not much                                                                           | 43(23.5%)           | 12(16.4%)                          | 3(8.1%)                             |        |
| -moderately                                                                         | 51 (27.9%)          | 13(17.8%)                          | 9(24.3%)                            |        |
| -enough                                                                             | 54 (29.5%)          | 27(37%)                            | 19(51.4%)                           |        |
| -extremely                                                                          | 25 (13.7%)          | 19 (26%)                           | 5 (13.3%)                           | 0.029* |
| 5.I avoided letting myself get upset when I thought about it or was reminded of it. |                     |                                    |                                     |        |
| - none                                                                              | 17(9.3%)            | 9(12.3%)                           | 2(5.4%)                             |        |
| -not much                                                                           | 62(33.9%)           | 15(20.5%)                          | 15(40.5%)                           |        |
| -moderately                                                                         | 51(27.9%)           | 27(37%)                            | 14(37.8%)                           |        |
| -enough                                                                             | 48(26.2%)           | 19(26%)                            | 6(16.2%)                            |        |
| -extremely                                                                          | 5(2.7%)             | 3(4.1%)                            | 0                                   | 0.258  |
| 6.I thought about it when I didn't mean to                                          |                     |                                    |                                     |        |
| - none                                                                              | 20(10.9%)           | 8(11%)                             | 2(5.4%)                             |        |
| -not much                                                                           | 52(28.4%)           | 18(24.7%)                          | 8(21.6%)                            |        |
| -moderately                                                                         | 62(33.9%)           | 15(20.5%)                          | 15(40.5%)                           |        |
| -enough                                                                             | 44(24%)             | 22(30.1%)                          | 6(16.2%)                            |        |
| -extremely                                                                          | 5(2.7%)             | 10(13.7%)                          | 6(16.2%)                            | 0.006* |
| 7.I felt as if it hadn't happened or wasn't real.                                   |                     |                                    |                                     |        |
| - none                                                                              | 72(39.3%)           | 26(35.6%)                          | 9(24.3%)                            |        |
| -not much                                                                           | 39(21.3%)           | 14(19.2%)                          | 11(29.7%)                           |        |
| -moderately                                                                         | 31(16.9%)           | 12(16.4%)                          | 11(29.7%)                           |        |
| -enough                                                                             | 31(16.9%)           | 19(26%)                            | 5(13.5%)                            |        |
| -extremely                                                                          | 10(5.5%)            | 2(2.7%)                            | 1(2.7%)                             | 0.247  |
| 8.I stayed away from reminders of it.                                               |                     |                                    |                                     |        |
| - none                                                                              | 58(31.7%)           | 14(19.2%)                          | 8(21.6%)                            |        |
| -not much                                                                           | 69(37.7%)           | 25(34.2%)                          | 13(35.1%)                           |        |
| -moderately                                                                         | 35(19.1%)           | 22(30.1%)                          | 10(27%)                             |        |
| -enough                                                                             | 14(7.7%)            | 8(11%)                             | 5(15.3%)                            |        |
| -extremely                                                                          | 7(3.8%)             | 4(5.5%)                            | 1(2.7%)                             | 0.360  |
| 9.Pictures about it popped into my mind.                                            |                     |                                    |                                     |        |
| - none                                                                              | 59 (32.2%)          | 21 (28.8%)                         | 8(21.6%)                            |        |
| -not much                                                                           | 57 (31.1%)          | 12 (16.4%)                         | 17 (45.9%)                          |        |
| -moderately                                                                         | 46 (25.1 %)         | 20 (27.4 %)                        | 4(10.8%)                            |        |
| -enough                                                                             | 16 (8.7%)           | 14 (19.2%)                         | 5 (13.5%)                           |        |
| -extremely                                                                          | 5(2.7%)             | 6(8.2%)                            | 3 (8.1%)                            | 0.006* |

|                                                                                                                            |             |             |            |         |
|----------------------------------------------------------------------------------------------------------------------------|-------------|-------------|------------|---------|
| 10.I was jumpy and easily startled.                                                                                        |             |             |            |         |
| - none                                                                                                                     | 30 (16.4%)  | 8 (11%)     | 6 (16.2%)  | 0.158   |
| -not much                                                                                                                  | 58 (31.7%)  | 15 (20.5%)  | 8(21.6%)   |         |
| -moderately                                                                                                                | 36 (19.7 %) | 18 (24.7 %) | 14(37.8%)  |         |
| -enough                                                                                                                    | 41 (22.4%)  | 21 (28.8%)  | 6 (16.2.%) |         |
| -extremely                                                                                                                 | 18(9.8%)    | 11(15.1%)   | 3 (8.1%)   |         |
| 11.I tried not to think about it.                                                                                          |             |             |            |         |
| - none                                                                                                                     | 18(9.8%)    | 4 (5.5%)    | 2 (5.4%)   | 0.439   |
| -not much                                                                                                                  | 40 (21.9%)  | 17 (23.3 %) | 11(29.7%)  |         |
| -moderately                                                                                                                | 55 (30.1%)  | 16 (21.9%)  | 13(35.1%)  |         |
| -enough                                                                                                                    | 53 (29 %)   | 28(38.4%)   | 10 (27.1%) |         |
| -extremely                                                                                                                 | 17 (9.3%)   | 8 (11%)     | 1 (2.7%)   |         |
| 12. I was aware that I still had a lot of feelings about it, but I didn't deal with them.                                  |             |             |            |         |
| - none                                                                                                                     | 53(29%)     | 17 (23.3 %) | 11(29.7%)  | 0.167   |
| -not much                                                                                                                  | 54 (29.5%)  | 10 (13.7%)  | 8(21.6%)   |         |
| -moderately                                                                                                                | 42 (23%)    | 24 (32.9%)  | 11(29.7%)  |         |
| -enough                                                                                                                    | 29 (15.8 %) | 19(26%)     | 6(16.2%)   |         |
| -extremely                                                                                                                 | 5 (2.7%)    | 3 (4.1%)    | 1 (2.7%)   |         |
| 13.My feelings about it were kind of numb.                                                                                 |             |             |            |         |
| - none                                                                                                                     | 74 (40.4%)  | 20 (27.4%)  | 12 (32.4%) | 0.391   |
| -not much                                                                                                                  | 40 (21.9%)  | 20 (27.4%)  | 10(27%)    |         |
| -moderately                                                                                                                | 39(21.3%)   | 13 (17.8%)  | 10(27%)    |         |
| -enough                                                                                                                    | 24 (13.1%)  | 16 (21.9%)  | 4(10.8%)   |         |
| -extremely                                                                                                                 | 6(3.3%)     | 4 (5.5%)    | 1(2.7%)    |         |
| 14.I found myself acting or feeling like I was back at that time.                                                          |             |             |            |         |
| - none                                                                                                                     | 66 (36.1%)  | 23 (31.5%)  | 7 (18.9%)  | 0.266   |
| -not much                                                                                                                  | 57 (31.1%)  | 19 (26%)    | 14(37.8%)  |         |
| -moderately                                                                                                                | 30 (16.4%)  | 13 (17.8%)  | 9(24.3%)   |         |
| -enough                                                                                                                    | 24 (13.1%)  | 17 (23.3%)  | 5(13.5%)   |         |
| -extremely                                                                                                                 | 6 (3.3%)    | 1(1.4%)     | 2(5.4%)    |         |
| 15.I had trouble falling asleep.                                                                                           |             |             |            |         |
| - none                                                                                                                     | 58 (31.7%)  | 15(20.5%)   | 4 (10.8%)  | 0.028*  |
| -not much                                                                                                                  | 41 (22.4%)  | 10 (13.7%)  | 5 (13.5%)  |         |
| -moderately                                                                                                                | 20 (10.9%)  | 11 (15.1%)  | 8 (21.6%)  |         |
| -enough                                                                                                                    | 37 (20.2%)  | 19 (26%)    | 11 (29.7%) |         |
| -extremely                                                                                                                 | 27 (14.8%)  | 18 (24.7%)  | 9(24.3%)   |         |
| 16.I had waves of strong feelings about it.                                                                                |             |             |            |         |
| - none                                                                                                                     | 37 (20.2%)  | 8 (11%)     | 5 (13.5%)  | 0.440   |
| -not much                                                                                                                  | 42 (23.0%)  | 20 (27.4%)  | 13 (35.1%) |         |
| -moderately                                                                                                                | 49 (26.8%)  | 16 (21.9%)  | 8 (21.6%)  |         |
| -enough                                                                                                                    | 39 (21.3%)  | 18 (24.7%)  | 7 (18.9%)  |         |
| -extremely                                                                                                                 | 16 (8.7%)   | 11 (15.1%)  | 4 (10.8%)  |         |
| 17.I tried to remove it from my memory.                                                                                    |             |             |            |         |
| - none                                                                                                                     | 84 (45.9%)  | 23(31.5%)   | 15 (40.5%) | 0.112   |
| -not much                                                                                                                  | 46 (25.1%)  | 15(20.5%)   | 12(32.4%)  |         |
| -moderately                                                                                                                | 24 (13.1%)  | 13(17.8%)   | 6(16.2%)   |         |
| -enough                                                                                                                    | 20 (10.9%)  | 16(21.9%)   | 4(10.8%)   |         |
| -extremely                                                                                                                 | 9 (4.9%)    | 6(8.2%)     | 0          |         |
| 18.I had trouble concentrating.                                                                                            |             |             |            |         |
| - none                                                                                                                     | 18(9.8%)    | 4(5.5%)     | 2(5.4%)    | <0.001* |
| -not much                                                                                                                  | 39(21.3%)   | 11(15.1%)   | 11(29.7%)  |         |
| -moderately                                                                                                                | 37(20.2%)   | 6(8.2%)     | 7(18.9%)   |         |
| -enough                                                                                                                    | 61(33.3%)   | 27(37%)     | 2(5.4%)    |         |
| -extremely                                                                                                                 | 28(15.3%)   | 25(34.2%)   | 15(40.5%)  |         |
| 19.Reminders of it caused me to have physical reactions, such as sweating, trouble breathing, nausea, or a pounding heart. |             |             |            |         |
| - none                                                                                                                     | 95 (51.9%)  | 95 (51.9%)  | 16 (43.2%) | 0.036*  |
| -not much                                                                                                                  | 39 (21.3%)  | 39 (21.3%)  | 10 (27%)   |         |
| -moderately                                                                                                                | 23 (12.6%)  | 23 (12.6%)  | 2 (5.4%)   |         |
| -enough                                                                                                                    | 22 (12%)    | 22 (12%)    | 6 (16.2%)  |         |
| -extremely                                                                                                                 | 4 (2.2%)    | 4 (2.2%)    | 3 (8.1%)   |         |
| 20.I had dreams about it.                                                                                                  |             |             |            |         |
| - none                                                                                                                     | 94(51.4%)   | 32(43.8%)   | 16(43.2%)  | 0.219   |
| -not much                                                                                                                  | 41(22.4%)   | 17(23.3%)   | 11(29.7%)  |         |
| -moderately                                                                                                                | 25(13.7%)   | 10(13.7%)   | 2(5.4%)    |         |
| -enough                                                                                                                    | 17(9.3%)    | 6(8.2%)     | 6(16.2%)   |         |
| -extremely                                                                                                                 | 6(3.3%)     | 8(11%)      | 2(5.4%)    |         |

|                                         |             |            |            |            |        |
|-----------------------------------------|-------------|------------|------------|------------|--------|
| 21. I felt watchful and on-guard.       | - none      | 22(12%)    | 8(11%)     | 1(2.7%)    | 0.007* |
|                                         | -not much   | 27(14.8%)  | 8(11%)     | 2(5.4%)    |        |
|                                         | -moderately | 41(22.4%)  | 18(24.7%)  | 17(45.9%)  |        |
|                                         | -enough     | 70(38.3%)  | 19(26%)    | 12(32.4%)  |        |
|                                         | -extremely  | 23(12.6%)  | 20(27.4%)  | 5(13.5%)   |        |
| 22. I tried not to talk about it. them. | - none      | 71 (38.8%) | 19 (26%)   | 7 (18.9%)  | 0.017* |
|                                         | -not much   | 44 (24%)   | 11 (15.1%) | 15 (40.5%) |        |
|                                         | -moderately | 37 (20.2%) | 24 (32.9%) | 7 (18.9%)  |        |
|                                         | -enough     | 20 (10.9%) | 14 (19.2%) | 6 (16.2%)  |        |
|                                         | -extremely  | 11 (6%)    | 5 (6.8%)   | 2 (5.4%)   |        |

| B                                                                                                                          |            |                          |                    |                  |         |
|----------------------------------------------------------------------------------------------------------------------------|------------|--------------------------|--------------------|------------------|---------|
| IN THE LAST YEAR HOW OFTEN ALTERATION OF MENSTRUAL CYCLE                                                                   |            |                          |                    |                  |         |
| PATIENTS n.293 (100%)                                                                                                      |            | 21-35 D<br>(260 / 88.7%) | >35 D<br>(29/9.9%) | <21D<br>(4/1.4%) | P       |
| 1.Any reminder brought back feelings about it                                                                              | - none     | 17 (65 %)                | 8 (27.6%)          | 0                | <0.001* |
|                                                                                                                            | -not much  | 68 (26.2 %)              | 2 (6.9%)           | 3 (75%)          |         |
|                                                                                                                            | moderately | 88 (33.8%)               | 7 (24.1%)          | 0                |         |
|                                                                                                                            | -enough    | 72 (27.7%)               | 8 (27.6%)          | 1 (25%)          |         |
|                                                                                                                            | -extremely | 15 (5.8%)                | 4(13.8%)           | 0                |         |
| 4.I felt irritable and angry                                                                                               | - none     | 13(5%)                   | 0                  | 0                | 0.053   |
|                                                                                                                            | -not much  | 49(18.8%)                | 9(16.4%)           | 0                |         |
|                                                                                                                            | moderately | 68(26.2%)                | 2(17.8%)           | 3(75%)           |         |
|                                                                                                                            | -enough    | 89(34.2%)                | 10(37%)            | 1(25%)           |         |
|                                                                                                                            | -extremely | 41(15.8%)                | 8 (26%)            | 0                |         |
| 5.I avoided letting myself get upset when I thought about it or was reminded of it.                                        | - none     | 22(8.5%)                 | 6(20.7%)           | 0                | 0.021*  |
|                                                                                                                            | -not much  | 85(32.7%)                | 5(17.2%)           | 2(50%)           |         |
|                                                                                                                            | moderately | 81(31.2%)                | 10(34.5%)          | 1(25%)           |         |
|                                                                                                                            | -enough    | 67(25.8%)                | 6(20.7%)           | 0                |         |
|                                                                                                                            | -extremely | 5(1.9%)                  | 2(6.9%)            | 1(25%)           |         |
| 18.I had trouble concentrating.                                                                                            | - none     | 22(8.5%)                 | 2(6.9%)            | 0                | <0.001* |
|                                                                                                                            | -not much  | 57(21.9%)                | 1(3.4%)            | 3(75%)           |         |
|                                                                                                                            | moderately | 48(18.5%)                | 2(6.9%)            | 0                |         |
|                                                                                                                            | -enough    | 79(30.4%)                | 11(37.9%)          | 0                |         |
|                                                                                                                            | -extremely | 54(20.8%)                | 13(44.8%)          | 1(25%)           |         |
| 19.Reminders of it caused me to have physical reactions, such as sweating, trouble breathing, nausea, or a pounding heart. | - none     | 132 (50.8%)              | 14 (48.3%)         | 1 (25%)          | 0.003*  |
|                                                                                                                            | -not much  | 60 (23.1%)               | 4 (13.8%)          | 0                |         |
|                                                                                                                            | moderately | 26 (10%)                 | 2 (6.9%)           | 0                |         |
|                                                                                                                            | -enough    | 31 (11.9%)               | 4 (13.8%)          | 3 (75%)          |         |
|                                                                                                                            | -extremely | 11 (4.2%)                | 5 (17.2%)          | 0                |         |

C

## IN THE LAST YEAR AMENORRHEA?

| PATIENTS n.293 (100%)                                                               | NO<br>270 (92.2%) | YES<br>23 (7.8%) | P      |
|-------------------------------------------------------------------------------------|-------------------|------------------|--------|
| 1.Any reminder brought back feelings about it                                       |                   |                  |        |
| - none                                                                              | 20(7.4%)          | 5(21.7%)         |        |
| -not much                                                                           | 73(27%)           | 0                |        |
| -moderately                                                                         | 86(31.9%)         | 9(39.1%)         |        |
| -enough                                                                             | 72(26.7%)         | 9(39.1%)         |        |
| -extremely                                                                          | 19(7%)            | 0                | 0.006* |
| 2.I had trouble staying asleep                                                      |                   |                  |        |
| - none                                                                              | 80 (29.6%)        | 2(8.7%)          |        |
| -not much                                                                           | 52 (19.3%)        | 3(13%)           |        |
| -moderately                                                                         | 46 (17%)          | 4(17.4 %)        |        |
| -enough                                                                             | 61 (22.6%)        | 10(43.5%)        |        |
| -extremely                                                                          | 31 (11.5%)        | 4(17.4%)         | 0.085  |
| 3.Other things kept making me think about it.                                       |                   |                  |        |
| - none                                                                              | 31 (11.5%)        | 1(4.3%)          |        |
| -not much                                                                           | 68 (25.2%)        | 4(17.4 %)        |        |
| -moderately                                                                         | 92 (34.1%)        | 2(8.7%)          |        |
| -enough                                                                             | 60 (22.2%)        | 12(52.2%)        |        |
| -extremely                                                                          | 19 (7%)           | 4(17.4%)         | 0.408  |
| 4.I felt irritable and angry                                                        |                   |                  |        |
| - none                                                                              | 12(4.4%)          | 1 (4.3%)         |        |
| -not much                                                                           | 54(20%)           | 12(16.4%)        |        |
| -moderately                                                                         | 71(26.3%)         | 13(17.8%)        |        |
| -enough                                                                             | 88(32.8%)         | 27(37%)          |        |
| -extremely                                                                          | 45 (16.7%)        | 19 (26%)         | 0.278  |
| 5.I avoided letting myself get upset when I thought about it or was reminded of it. |                   |                  |        |
| - none                                                                              | 26(9.6%)          | 2(8.7%)          |        |
| -not much                                                                           | 86(31.9%)         | 6(26.1%)         |        |
| -moderately                                                                         | 82(30.4%)         | 10(43.5%)        |        |
| -enough                                                                             | 70(25.9%)         | 13(4.1%)         |        |
| -extremely                                                                          | 6(2.2%)           | 2(8.7%)          | 0.194  |
| 6.I thought about it when I didn't mean to                                          |                   |                  |        |
| - none                                                                              | 28(10.4%)         | 2(8.7%)          |        |
| -not much                                                                           | 73(27%)           | 5(21.7%)         |        |
| -moderately                                                                         | 84(31.1%)         | 8(34.8%)         |        |
| -enough                                                                             | 66(24.4%)         | 6(26.1%)         |        |
| -extremely                                                                          | 19(7%)            | 2(8.7%)          | 0.976  |
| 7.I felt as if it hadn't happened or wasn't real.                                   |                   |                  |        |
| - none                                                                              | 101(37.4%)        | 6(26.1%)         |        |
| -not much                                                                           | 60(22.2%)         | 4(17.4%)         |        |
| -moderately                                                                         | 50(18.5%)         | 4(17.4%)         |        |
| -enough                                                                             | 47(17.4%)         | 8(34.8%)         |        |
| -extremely                                                                          | 12(4.4%)          | 1(4.3%)          | 0.355  |
| 8.I stayed away from reminders of it.                                               |                   |                  |        |
| - none                                                                              | 75(27.8%)         | 5(21.7%)         |        |
| -not much                                                                           | 98(36.3%)         | 9(39.1%)         |        |
| -moderately                                                                         | 63(23.3%)         | 4(17.4%)         |        |
| -enough                                                                             | 23(8.5%)          | 4(17.4%)         |        |
| -extremely                                                                          | 11(4.1%)          | 1(4.3%)          | 0.650  |
| 9.Pictures about it popped into my mind.                                            |                   |                  |        |
| - none                                                                              | 82(30.4%)         | 6(26.1%)         |        |
| -not much                                                                           | 79(29.3%)         | 7(30.4%)         |        |
| -moderately                                                                         | 63(23.3%)         | 7(30.4 %)        |        |
| -enough                                                                             | 32 (11.9%)        | 3(13%)           |        |
| -extremely                                                                          | 14(5.2%)          | 0                | 0.772  |
| 10.I was jumpy and easily startled.                                                 |                   |                  |        |
| - none                                                                              | 42 (15.6%)        | 2(8.7%)          |        |
| -not much                                                                           | 75 (27.8%)        | 6(26.1%)         |        |
| -moderately                                                                         | 62 (23%)          | 6(26.1%)         |        |
| -enough                                                                             | 61(22.6%)         | 7(30.7%)         |        |
| -extremely                                                                          | 30(11.1%)         | 2(8.7%)          | 0.835  |

|                                                                                                                             |                                                             |                                                                    |                                                             |        |
|-----------------------------------------------------------------------------------------------------------------------------|-------------------------------------------------------------|--------------------------------------------------------------------|-------------------------------------------------------------|--------|
| 11. I tried not to think about it.                                                                                          | - none<br>-not much<br>-moderately<br>-enough<br>-extremely | 22(8.1%)<br>60(23%)<br>79(29.3%)<br>82 (30.4%)<br>25(9.3%)         | 2(8.7%)<br>6(26.1%)<br>5 (21.7%)<br>9(39.1%)<br>1 (4.3%)    | 0.806  |
| 12. I was aware that I still had a lot of feelings about it, but I didn't deal with them.                                   | - none<br>-not much<br>-moderately<br>-enough<br>-extremely | 76(28.1%)<br>68(25.2%)<br>71(26.3%)<br>47(26.3%)<br>8(3%)          | 5(21.7%)<br>4(17.4%)<br>6(26.1%)<br>7(30.4%)<br>1 (4.3%)    | 0.571  |
| 13. My feelings about it were kind of numb.                                                                                 | - none<br>-not much<br>-moderately<br>-enough<br>-extremely | 101 (37.4%)<br>65 (24.1%)<br>59(21.9%)<br>36(13.3%)<br>9(3.3%)     | 5(21.7%)<br>5(21.7%)<br>3(13%)<br>8 (34.8%)<br>2 (8.7%)     | 0.034* |
| 14. I found myself acting or feeling like I was back at that time.                                                          | - none<br>-not much<br>-moderately<br>-enough<br>-extremely | 89 (33%)<br>88 (32.6%)<br>44 (16.3%)<br>40 (14.8%)<br>9 (3.3%)     | 7 (30.4%)<br>2 (8.7%)<br>8 (34.8%)<br>6 (26.1%)<br>0        | 0.032* |
| 15. I had trouble falling asleep.                                                                                           | - none<br>-not much<br>-moderately<br>-enough<br>-extremely | 74 (27.4%)<br>53 (19.6%)<br>37 (13.7%)<br>58 (21.5%)<br>48 (17.8%) | 3(13%)<br>3(13%)<br>2 (8.7%)<br>9 (39.1%)<br>6 (26.1%)      | 0.183  |
| 16. I had waves of strong feelings about it.                                                                                | - none<br>-not much<br>-moderately<br>-enough<br>-extremely | 45 (16.7%)<br>73 (27%)<br>67 (24.8%)<br>57 (21.1%)<br>28 (10.4%)   | 5(21.7%)<br>2 (8.7%)<br>6 (26.1%)<br>7 (30.4%)<br>3(13%)    | 0.392  |
| 17. I tried to remove it from my memory.                                                                                    | - none<br>-not much<br>-moderately<br>-enough<br>-extremely | 116 (43%)<br>66 (24.4%)<br>38 (14.1%)<br>36 (13.3%)<br>14 (5.2%)   | 6 (26.1%)<br>7 (30.4%)<br>5(21.7%)<br>4(17.4%)<br>1 (4.3%)  | 0.577  |
| 18. I had trouble concentrating.                                                                                            | - none<br>-not much<br>-moderately<br>-enough<br>-extremely | 21(7.8%)<br>59(21.9%)<br>48(17.8%)<br>81(30%)<br>61(22.6%)         | 3(13%)<br>2 (8.7%)<br>2 (8.7%)<br>9 (39.1%)<br>7 (30.4%)    | 0.326  |
| 19. Reminders of it caused me to have physical reactions, such as sweating, trouble breathing, nausea, or a pounding heart. | - none<br>-not much<br>-moderately<br>-enough<br>-extremely | 136 (50.4%)<br>59 (21.9%)<br>28 (10.4%)<br>33 (12.2%)<br>14 (5.2%) | 11 (47.8%)<br>5 (21.7%)<br>0<br>5 (21.7%)<br>2 (8.7%)       | 0.358  |
| 20. I had dreams about it.                                                                                                  | - none<br>-not much<br>-moderately<br>-enough<br>-extremely | 129(47.8%)<br>67(24.8%)<br>33(12.2%)<br>10(27%)<br>14(5.2%)        | 13(56.6%)<br>2 (8.7%)<br>4(17.4%)<br>2 (8.7%)<br>2 (8.7%)   | 0.458  |
| 21. I felt watchful and on-guard.                                                                                           | - none<br>-not much<br>-moderately<br>-enough<br>-extremely | 29(10.7%)<br>35(13%)<br>71(26.7%)<br>91(33.7%)<br>43(15.9%)        | 2 (8.7%)<br>2 (8.7%)<br>4(17.4%)<br>10 (43.5%)<br>5 (21.7%) | 0.714  |
| 22. I tried not to talk about it. them.                                                                                     | - none<br>-not much<br>-moderately<br>-enough<br>-extremely | 92 (34.1%)<br>65 (24.1%)<br>58 (21.5%)<br>38 (14.1%)<br>17 (6.3%)  | 5 (21.7%)<br>5(21.7%)<br>10 (43.5%)<br>2 (8.7%)<br>1 (4.3%) | 0.198  |

**D**

**AMENORRHEA**

| <b>PATIENTS n.293 (100%)</b>                                                                                                                       | <b>No<br/>(132 / 45.1%)</b>                                       | <b>Increase<br/>(86/29.4%)</b>                                     | <b>Reduction<br/>(75/25.6%)</b>                                | <b>P</b> |
|----------------------------------------------------------------------------------------------------------------------------------------------------|-------------------------------------------------------------------|--------------------------------------------------------------------|----------------------------------------------------------------|----------|
| 1.Any reminder brought back feelings about it<br>-<br>-none<br>-not much<br>-moderately<br>-enough<br>-extremely                                   | 13 (8.2%)<br>33 (25.7%)<br>38 (37.7%)<br>41 (24%)<br>7 (4.4%)     | 3 (3.5%)<br>22 (25.6%)<br>34 (39.5%)<br>21 (24.4%)<br>6(7%)        | 9 (12%)<br>18 (24%)<br>23 (30.7%)<br>19 (25.3%)<br>6 (8%)      | 0.485    |
| 2.I had trouble staying asleep<br>-<br>-none<br>-not much<br>-moderately<br>-enough<br>-extremely                                                  | 46 (34.8%)<br>24 (18.2%)<br>22 (16.7%)<br>27 (20.5%)<br>13 (9.8%) | 20 (23.3%)<br>18 (20.9%)<br>16 (18.6%)<br>16 (18.6%)<br>16 (18.6%) | 16(21.3%)<br>13 (17.3%)<br>12 (16%)<br>28 (37.3%)<br>6 (8%)    | 0.036*   |
| 3.Other things kept making me think about it.<br>- none<br>-not much<br>-moderately<br>-enough<br>-extremely                                       | 14 (10.6%)<br>33 (25%)<br>50 (37.9%)<br>24 (18.2%)<br>11 (8.3%)   | 11 (12.8%)<br>25 (29.1%)<br>25 (29.1%)<br>22(25.6%)<br>3 (3.5%)    | 7(9.3%)<br>15 (20%)<br>28 (37.3%)<br>20 (26.7%)<br>5 (6.7%)    | 0.537    |
| 4.I felt irritable and angry<br>- none<br>-not much<br>-moderately<br>-enough<br>-extremely                                                        | 8(61.1%)<br>27 (20.5%)<br>38(28.8%)<br>32(24.2%)<br>27 (20.5%)    | 4(4.7%)<br>14(16.3%)<br>20(23.3%)<br>34(39.5%)<br>14(16.3%)        | 1(1.3%)<br>17(22.7%)<br>15(20%)<br>34(45.3%)<br>8(10.7%)       | 0.060    |
| 5.I avoided letting myself get upset when I thought about it or was reminded of it.<br>- none<br>-not much<br>-moderately<br>-enough<br>-extremely | 15(11.4%)<br>51(38.6%)<br>37 (28%)<br>27 (20.5%)<br>2 (1.5%)      | 7(8.1%)<br>20(23.3%)<br>35(40.7%)<br>23(26.7%)<br>1(1.2%)          | 6(8%)<br>21(28%)<br>20(26.7%)<br>23(30.7%)<br>5(6.7%)          | 0.037*   |
| 6.I thought about it when I didn't mean t<br>- none<br>-not much<br>-moderately<br>-enough<br>-extremely                                           | 9 (6.8%)<br>33 (25%)<br>45 (34.1%)<br>34 (25.8%)<br>11 (8.3%)     | 11(12.8%)<br>27(31.4%)<br>22(25.6%)<br>22(25.6%)<br>4(4.7%)        | 10(13.3%)<br>18(24%)<br>25(33.3%)<br>16(21.3%)<br>6(8%)        | 0.575    |
| 7.I felt as if it hadn't happened or wasn't real.<br>- none<br>-not much<br>-moderately<br>-enough<br>-extremely                                   | 56(42.4%)<br>25(18.9%)<br>22(16.7%)<br>23 (17.4%)<br>6 (4.5%)     | 26 (30.2%)<br>23 (26.7%)<br>19 (22%)<br>14 (16.3%)<br>4 (4.7%)     | 25 (33%)<br>16 (21.3%)<br>13 (17.3%)<br>18 (24%)<br>3 (4%)     | 0.612    |
| 8.I stayed away from reminders of it.<br>- none<br>-not much<br>-moderately<br>-enough<br>-extremely                                               | 42 (31.8%)<br>47 (35.6%)<br>30 (22.7%)<br>8 (6.1%)<br>5 (3.8%)    | 23 (26.7%)<br>35 (40.7%)<br>21 (24.4%)<br>5 (5.8%)<br>2 (2.3%)     | 15 (20%)<br>25 (33.3%)<br>16 (21.3%)<br>14 (18.7%)<br>5 (6.7%) | 0.060    |
| 9.Pictures about it popped into my mind.<br>- none<br>-not much<br>-moderately<br>-enough<br>-extremely                                            | 41 (31.1%)<br>35 (26.5%)<br>36 (27.3%)<br>12 (9.1%)<br>8 (6.1%)   | 26 (30.2%)<br>23 (26.7%)<br>21 (24.4%)<br>12 (14%)<br>4(4.7%)      | 21 (28%)<br>28 (37.3%)<br>13 (17%)<br>11 (14.7%)<br>2 (2.7%)   | 0.521    |
| 10.I was jumpy and easily startled.<br>- none<br>-not much<br>-moderately<br>-enough<br>-extremely                                                 | 23 (17.4%)<br>35 (26%)<br>27 (20.5%)<br>30 (22%)<br>17 (12%)      | 11 (12%)<br>27 (31.4%)<br>18 (20.9%)<br>22 (25.6%)<br>8 (9.3%)     | 10 (13%)<br>19 (25.3%)<br>23 (30.7%)<br>16 (12%)<br>7 (9.3%)   | 0.738    |

|                                                                                                                             |                                                             |                                                                    |                                                                    |                                                                  |        |
|-----------------------------------------------------------------------------------------------------------------------------|-------------------------------------------------------------|--------------------------------------------------------------------|--------------------------------------------------------------------|------------------------------------------------------------------|--------|
| 11. I tried not to think about it.                                                                                          | - none<br>-not much<br>-moderately<br>-enough<br>-extremely | 10 (7.6%)<br>37 (28%)<br>41 (31.1%)<br>32 (24.2%)<br>12 (9.1%)     | 9 (10.5%)<br>20 (23.3%)<br>19 (22.1%)<br>31 (36%)<br>7 (8.1%)      | 5 (6.7%)<br>11 (14.7%)<br>24 (32%)<br>28 (37.3%)<br>7 (9.3%)     | 0.262  |
| 12. I was aware that I still had a lot of feelings about it, but I didn't deal with them.                                   | - none<br>-not much<br>-moderately<br>-enough<br>-extremely | 34 (25.8%)<br>36 (27.3%)<br>33 (25%)<br>26 (16.7%)<br>3 (2.3%)     | 24 (27.9%)<br>20 (23.3%)<br>22 (25.6%)<br>15 (17.4%)<br>5 (5.8%)   | 23 (30.7%)<br>16 (12.3%)<br>22 (29.3%)<br>13 (17.3%)<br>1 (1.3%) | 0.770  |
| 13. My feelings about it were kind of numb.                                                                                 | - none<br>-not much<br>-moderately<br>-enough<br>-extremely | 53 (40.2%)<br>27 (20.5%)<br>33 (25%)<br>16 (12.1%)<br>3 (2.3%)     | 30 (34%)<br>23 (26%)<br>15 (17%)<br>14 (16%)<br>4 (4.7%)           | 23 (30.7%)<br>20 (26.7%)<br>14 (18.7%)<br>14 (18%)<br>4 (5.3%)   | 0.528  |
| 14. I found myself acting or feeling like I was back at that time.                                                          | - none<br>-not much<br>-moderately<br>-enough<br>-extremely | 45 (34.1%)<br>38 (28.4%)<br>25 (18.9%)<br>23 (17.4%)<br>1 (0.8%)   | 27 (31.4%)<br>26 (30.2%)<br>15 (17.4%)<br>13 (15.1%)<br>5 (5.8%)   | 24 (32%)<br>26 (34.7%)<br>12 (16%)<br>10 (13.3%)<br>3 (4%)       | 0.639  |
| 15. I had trouble falling asleep.                                                                                           | - none<br>-not much<br>-moderately<br>-enough<br>-extremely | 43 (32.6%)<br>23 (17.4%)<br>16 (12.1%)<br>27 (20.5%)<br>23 (17.4%) | 16 (18%)<br>19 (22.1%)<br>14 (16.3%)<br>19 (22.1%)<br>18 (20.9%)   | 18 (24%)<br>14 (18.7%)<br>9 (12%)<br>21 (28%)<br>13 (17.3%)      | 0.524  |
| 16. I had waves of strong feelings about it                                                                                 | - none<br>-not much<br>-moderately<br>-enough<br>-extremely | 22 (16.7%)<br>35 (26.5%)<br>35 (26.5%)<br>26 (19.7%)<br>14 (10.6%) | 12 (14%)<br>22 (25.6%)<br>19 (22.1%)<br>23 (26.7%)<br>10 (11.6%)   | 16 (21.3%)<br>18 (24%)<br>19 (25.3%)<br>15 (20%)<br>7 (9.3%)     | 0.909  |
| 17. I tried to remove it from my memory.                                                                                    | - none<br>-not much<br>-moderately<br>-enough<br>-extremely | 58 (43%)<br>35 (26.5%)<br>18 (13.6%)<br>10 (7.6%)<br>11 (8.3%)     | 32 (37.2%)<br>23 (26.7%)<br>16 (18.6%)<br>13 (15.1%)<br>2 (2.3%)   | 32 (42.7%)<br>15 (20%)<br>9 (12%)<br>17 (22.7%)<br>2 (2.7%)      | 0.043* |
| 18. I had trouble concentrating.                                                                                            | - none<br>-not much<br>-moderately<br>-enough<br>-extremely | 16 (12.1%)<br>29 (22%)<br>24 (18.2%)<br>36 (27.3%)<br>27 (20.5%)   | 3 (3.5%)<br>15 (17.4%)<br>16 (18.6%)<br>31 (36%)<br>21 (24.4%)     | 5 (6.7%)<br>17 (22.7%)<br>10 (13.3%)<br>23 (30.7%)<br>20 (26.7%) | 0.368  |
| 19. Reminders of it caused me to have physical reactions, such as sweating, trouble breathing, nausea, or a pounding heart. | - none<br>-not much<br>-moderately<br>-enough<br>-extremely | 64 (48.5%)<br>28 (21%)<br>19 (14%)<br>14 (10.6%)<br>7 (5.3%)       | 46 (53.5%)<br>21 (24.4%)<br>4 (4.7%)<br>12 (14%)<br>3 (3.5%)       | 37 (49.3%)<br>15 (20%)<br>5 (6%)<br>12 (16%)<br>6 (8%)           | 0.310  |
| 20. I had dreams about it.                                                                                                  | - none<br>-not much<br>-moderately<br>-enough<br>-extremely | 61 (46.2%)<br>29 (22%)<br>22 (16.7%)<br>11 (8.3%)<br>9 (6.8%)      | 41 (47.7%)<br>24 (27.9%)<br>11 (12.8%)<br>9 (10.5%)<br>1 (1.2%)    | 40 (53.3%)<br>16 (12.3%)<br>4 (5.3%)<br>9 (12%)<br>6 (8%)        | 0.185  |
| 21. I felt watchful and on-guard.                                                                                           | - none<br>-not much<br>-moderately<br>-enough<br>-extremely | 15 (11.4%)<br>18 (13%)<br>38 (28.8%)<br>41 (31.1%)<br>20 (15.2%)   | 11 (12.8%)<br>11 (12.8%)<br>15 (17.4%)<br>34 (39.5%)<br>15 (17.4%) | 5 (6.7%)<br>8 (10.7%)<br>23 (30.7%)<br>26 (34.7%)<br>13 (17.3%)  | 0.574  |
| 22. I tried not to talk about it. them.                                                                                     | - none<br>-not much<br>-moderately<br>-enough<br>-extremely | 49 (37.1%)<br>30 (22.7%)<br>29 (22%)<br>15 (11%)<br>9 (6.8%)       | 27 (31.4%)<br>28 (38.6%)<br>19 (22.1%)<br>10 (11.6%)<br>2 (2.3%)   | 21 (28%)<br>12 (16%)<br>20 (26.7%)<br>15 (20%)<br>7 (9.3%)       | 0.115  |



| PATIENTS n.293 (100%)                                                               | NO<br>(138 / 47.1%) | YES<br>(155/52.9%) | P      |
|-------------------------------------------------------------------------------------|---------------------|--------------------|--------|
| 1.Any reminder brought back feelings about it                                       |                     |                    |        |
| - none                                                                              | 16 (11%)            | 9(5.8%)            |        |
| -not much                                                                           | 35 (25.4%)          | 38 (24.5%)         |        |
| -moderately                                                                         | 48 (34.8%)          | 47 (30.3%)         |        |
| -enough                                                                             | 34 (24.6%)          | 47 (30.3%)         |        |
| -extremely                                                                          | 5(3.6%)             | 14 (9%)            | 0.112  |
| 2.I had trouble staying asleep                                                      |                     |                    |        |
| - none                                                                              | 47 (34.1%)          | 35 (22.6%)         |        |
| -not much                                                                           | 23 (16.7%)          | 32 (20.6%)         |        |
| -moderately                                                                         | 26 (18.8%)          | 24 (15.5%)         |        |
| -enough                                                                             | 34 (24.6%)          | 37 (23.9%)         |        |
| -extremely                                                                          | 8 (5.8%)            | 27 (17.4%)         | 0.012* |
| 3.Other things kept making me think about it.                                       |                     |                    |        |
| - none                                                                              | 16 (11.6%)          | 16 (10.3%)         |        |
| -not much                                                                           | 29 (21%)            | 44 (28.4%)         |        |
| -moderately                                                                         | 55 (39.9%)          | 48 (31%)           |        |
| -enough                                                                             | 32 (23.2%)          | 34 (21%)           |        |
| -extremely                                                                          | 6 (4.3%)            | 13 (8.4%)          | 0.265  |
| 4.I felt irritable and angry                                                        |                     |                    |        |
| - none                                                                              | 10 (7.2%)           | 3 (1.9%)           |        |
| -not much                                                                           | 31 (22.5%)          | 27 (17.4%)         |        |
| -moderately                                                                         | 36 (26.1%)          | 37 (23.9%)         |        |
| -enough                                                                             | 46 (33.3%)          | 54 (34.8%)         |        |
| -extremely                                                                          | 15 (10.9%)          | 34 (21.9%)         | 0.025* |
| 5.I avoided letting myself get upset when I thought about it or was reminded of it. |                     |                    |        |
| - none                                                                              | 14 (10.1%)          | 14 (9%)            |        |
| -not much                                                                           | 43 (31.2%)          | 49 (31.6%)         |        |
| -moderately                                                                         | 44 (31.9%)          | 48 (31%)           |        |
| -enough                                                                             | 33 (23.9%)          | 40 (25.8%)         |        |
| -extremely                                                                          | 4 (2.9%)            | 4(2.6%)            | 0.993  |
| 6.I thought about it when I didn't mean to                                          |                     |                    |        |
| - none                                                                              | 14 (10.1%)          | 16 (10.3%)         |        |
| -not much                                                                           | 41 (29.7%)          | 37 (23.9%)         |        |
| -moderately                                                                         | 49 (35.5%)          | 43 (27.7%)         |        |
| -enough                                                                             | 30 (21.7%)          | 42 (27.1%)         |        |
| -extremely                                                                          | 4(2.9%)             | 17 (11%)           | 0.043* |
| 7.I felt as if it hadn't happened or wasn't real.                                   |                     |                    |        |
| - none                                                                              | 51 (37%)            | 56 (36.1%)         |        |
| -not much                                                                           | 29 (21%)            | 35 (22.6%)         |        |
| -moderately                                                                         | 21 (15.2%)          | 33 (21.3%)         |        |
| -enough                                                                             | 31 (22.5%)          | 24 (15.5%)         |        |
| -extremely                                                                          | 6 (4.3%)            | 7 (4.5%)           | 0.485  |
| 8.I stayed away from reminders of it.                                               |                     |                    |        |
| - none                                                                              | 45 (32.6%)          | 35 (22.6%)         |        |
| -not much                                                                           | 43 (31.2%)          | 64 (41.3%)         |        |
| -moderately                                                                         | 29 (21%)            | 38 (24.5%)         |        |
| -enough                                                                             | 18 (13%)            | 9(5.8%)            |        |
| -extremely                                                                          | 3(2.2%)             | 9 (5.8%)           | 0.020* |
| 9.Pictures about it popped into my mind.                                            |                     |                    |        |
| - none                                                                              | 43 (31.2%)          | 45 (29%)           |        |
| -not much                                                                           | 43 (31.2%)          | 43 (27.7%)         |        |
| -moderately                                                                         | 41 (29.7%)          | 29 (18.7%)         |        |
| -enough                                                                             | 9 (6.5%)            | 26 (16.8%)         |        |
| -extremely                                                                          | 2 (1.4%)            | 12 (7.7%)          | 0.02*  |
| 10.I was jumpy and easily startled.                                                 |                     |                    |        |
| - none                                                                              | 29 (21%)            | 15 (9.7%)          |        |
| -not much                                                                           | 40 (29%)            | 41 (26.5%)         |        |
| -moderately                                                                         | 31 (22.5%)          | 37 (23.9%)         |        |
| -enough                                                                             | 30 (21.7%)          | 38 (24.5%)         |        |
| -extremely                                                                          | 8 (5.8%)            | 24 (15.5%)         | 0.011* |
| 11.I tried not to think about it.                                                   |                     |                    |        |
| - none                                                                              | 10 (7.2%)           | 14 (9%)            |        |
| -not much                                                                           | 41 (29.7%)          | 27 (17.4%)         |        |
| -moderately                                                                         | 33 (23.9%)          | 51 (32.9%)         |        |
| -enough                                                                             | 44 (31.9%)          | 47 (39.3%)         |        |
| -extremely                                                                          | 10 (7.2%)           | 16 (10.3%)         | 0.094* |

|                                                                                                                            |            |            |         |
|----------------------------------------------------------------------------------------------------------------------------|------------|------------|---------|
| 12. I was aware that I still had a lot of feelings about it, but I didn't deal with them.                                  |            |            |         |
| - none                                                                                                                     | 48 (34.8%) | 33 (21.3%) |         |
| -not much                                                                                                                  | 28 (20.3%) | 44 (28.4%) |         |
| -moderately                                                                                                                | 40 (29%)   | 37 (23.9%) |         |
| -enough                                                                                                                    | 22 (17.9%) | 32 (20.6%) |         |
| -extremely                                                                                                                 | 0          | 9(5.8%)    | 0.003*  |
| 13.My feelings about it were kind of numb.                                                                                 |            |            |         |
| - none                                                                                                                     | 52(37.7%)  | 54 (34.8%) |         |
| -not much                                                                                                                  | 35 (25.4%) | 35 (26.6%) |         |
| -moderately                                                                                                                | 31 (22.5%) | 31 (20%)   |         |
| -enough                                                                                                                    | 15 (10.9%) | 29 (18.7%) |         |
| -extremely                                                                                                                 | 5 (3.6%)   | 6 (3.9%)   | 0.462   |
| 14.I found myself acting or feeling like I was back at that time.                                                          |            |            |         |
| - none                                                                                                                     | 56 (40.6%) | 40 (25.8%) |         |
| -not much                                                                                                                  | 39 (28.3%) | 51 (32.9%) |         |
| -moderately                                                                                                                | 22 (15.9%) | 30 (19.4%) |         |
| -enough                                                                                                                    | 21 (15.2%) | 25 (16.1%) |         |
| -extremely                                                                                                                 | 0          | 9(5.8%)    | 0.008*  |
| 15.I had trouble falling asleep.                                                                                           |            |            |         |
| - none                                                                                                                     | 42 (30.4%) | 35 (22.6%) |         |
| -not much                                                                                                                  | 29 (21%)   | 27 (17.4%) |         |
| -moderately                                                                                                                | 22 (15.9%) | 17 (11%)   |         |
| -enough                                                                                                                    | 33 (23.9%) | 34 (21.9%) |         |
| -extremely                                                                                                                 | 12 (8.7%)  | 42 (27.1%) | 0.002*  |
| 16.I had waves of strong feelings about it.                                                                                |            |            |         |
| - none                                                                                                                     | 34 (24.6%) | 16 (10.3%) |         |
| -not much                                                                                                                  | 27 (19.6%) | 48 (31%)   |         |
| -moderately                                                                                                                | 43 (31.2%) | 30 (19.4%) |         |
| -enough                                                                                                                    | 25 (18.1%) | 39 (25.2%) |         |
| -extremely                                                                                                                 | 9 (6.5%)   | 22 (14.2%) | <0.001* |
| 17.I tried to remove it from my memory.                                                                                    |            |            |         |
| - none                                                                                                                     | 59 (42.8%) | 63 (40.6%) |         |
| -not much                                                                                                                  | 39 (28.3%) | 34 (21.9%) |         |
| -moderately                                                                                                                | 18 (13%)   | 25 (16.1%) |         |
| -enough                                                                                                                    | 17 (12.3%) | 23 (14.8%) |         |
| -extremely                                                                                                                 | 5 (3.6%)   | 10 (6.5%)  | 0.524   |
| 18.I had trouble concentrating.                                                                                            |            |            |         |
| - none                                                                                                                     | 18 (13%)   | Sei (3.9%) |         |
| -not much                                                                                                                  | 32 (23.2%) | 29 (18%)   |         |
| -moderately                                                                                                                | 25 (18.1%) | 25 (16.1%) |         |
| -enough                                                                                                                    | 38 (27%)   | 52 (33.5%) |         |
| -extremely                                                                                                                 | 25 (18.1%) | 43 (27.7%) | 0.016*  |
| 19.Reminders of it caused me to have physical reactions, such as sweating, trouble breathing, nausea, or a pounding heart. |            |            |         |
| - none                                                                                                                     | 82 (59.4%) | 65 (41.9%) |         |
| -not much                                                                                                                  | 28 (20.3%) | 36 (23.2%) |         |
| -moderately                                                                                                                | 13 (9.4%)  | 15 (9.7%)  |         |
| -enough                                                                                                                    | 14 (10.1%) | 24 (15.5%) |         |
| -extremely                                                                                                                 | 1(0.7%)    | 15 (9.7%)  | 0.002*  |
| 20.I had dreams about it.                                                                                                  |            |            |         |
| - none                                                                                                                     | 76 (55.1%) | 66 (42.6%) |         |
| -not much                                                                                                                  | 29 (21%)   | 40 (25.8%) |         |
| -moderately                                                                                                                | 15 (10.9%) | 22 (14.2%) |         |
| -enough                                                                                                                    | 13 (9.4%)  | 16 (10.3%) |         |
| -extremely                                                                                                                 | 5 (3.6%)   | 11 (7.1%)  | 0.251   |
| 21. I felt watchful and on-guard.                                                                                          |            |            |         |
| - none                                                                                                                     | 20 (14.5%) | 11 (7.1%)  |         |
| -not much                                                                                                                  | 24 (17.4%) | 13 (8.4%)  |         |
| -moderately                                                                                                                | 25 (18.1%) | 51 (32.9%) |         |
| -enough                                                                                                                    | 50 (36.2%) | 51 (32.9%) |         |
| -extremely                                                                                                                 | 19 (13.8%) | 29 (18.7%) | 0.003*  |
| 22. I tried not to talk about it. them.                                                                                    |            |            |         |
| - none                                                                                                                     | 56 (40.6%) | 41 (26.5%) |         |
| -not much                                                                                                                  | 35 (25.4%) | 35 (22.6%) |         |
| -moderately                                                                                                                | 23 (16.7%) | 45 (29%)   |         |
| -enough                                                                                                                    | 15 (10.4%) | 25 (16.1%) |         |
| -extremely                                                                                                                 | 9 (6.5%)   | 9 (5.8%)   | 0.027*  |

BDI TEST

supplementary

Table S2. relationship between the menstrual cycle and the impact of the pandemic as a traumatic event.

A, B: relationship with the altered duration of the menstrual cycle; C: Amenorrhea; D: Change Weight; E: Premenstrual syndrome

| <b>A</b>                                                           |                             |                                            |                                             |          |
|--------------------------------------------------------------------|-----------------------------|--------------------------------------------|---------------------------------------------|----------|
| <b>IN THE LAST YEAR ALTERATION OF MENSTRUAL CYCLE</b>              |                             |                                            |                                             |          |
| <b>PATIENTS n.293 (100%)</b>                                       | <b>No<br/>(183 / 62.5%)</b> | <b>Increase of interval<br/>(73/24.9%)</b> | <b>Reduction of interval<br/>(37/12.6%)</b> | <b>P</b> |
| QUESTION 1                                                         |                             |                                            |                                             |          |
| do not feel sad.                                                   | 89(48.6%)                   | 16(21.9%)                                  | 10 (27%)                                    |          |
| feel sad                                                           | 78(42.6%)                   | 39(53.4%)                                  | 22 (59.5%)                                  |          |
| -I am sad all the time and I can't snap out of it                  | 15(8.2%)                    | 15(20.5%)                                  | 3 (8.1%)                                    |          |
| I am so sad and unhappy that I can't stand it                      | 1(0.5%)                     | 3(4.1%)                                    | 2 (5.4%)                                    | <0.001*  |
| QUESTION 2                                                         |                             |                                            |                                             |          |
| I am not particularly discouraged about the future                 |                             |                                            |                                             |          |
| I feel discouraged about the future.                               | 88(48.1%)                   | 29(39.7%)                                  | 14(37.8%)                                   |          |
| I feel I have nothing to look forward to.                          | 75(41.0%)                   | 36(49.3%)                                  | 14(37.8%)                                   |          |
| I feel the future is hopeless and that things cannot improve       | 15(8.2%)                    | 6(8.2%)                                    | 6(16.2%)                                    |          |
|                                                                    | 5(2.7%)                     | 2(2.7%)                                    | 3(8.1%)                                     | 0.291    |
| QUESTION 3                                                         |                             |                                            |                                             |          |
| I do not feel like a failure                                       |                             |                                            |                                             |          |
| I feel I have failed more than the average person.                 | 126(68.9%)                  | 47(64.4%)                                  | 20(54.1%)                                   |          |
| As I look back on my life, all I can see is a lot of failures.     | 38(20.8%)                   | 22(30.1%)                                  | 8(21.6%)                                    |          |
| I feel I am a complete failure as a person.                        | 14(7.7%)                    | 2(2.7%)                                    | 2(5.4%)                                     |          |
|                                                                    | 5(2.7%)                     | 2(2.7%)                                    | 7(18.9%)                                    | <0.001*  |
| QUESTION 4                                                         |                             |                                            |                                             |          |
| I get as much satisfaction out of things as I used to.             |                             |                                            |                                             |          |
| I don't enjoy things the way I used to.                            | 63(34.4%)                   | 19(26%)                                    | 10(27%)                                     |          |
| I don't get real satisfaction out of anything anymore.             | 90(49.2%)                   | 41(56.2%)                                  | 20(54.1%)                                   |          |
| I am dissatisfied or bored with everything                         | 11(6%)                      | 9(12.3%)                                   | 3(8.1%)                                     |          |
|                                                                    | 19(10.4%)                   | 4(5.5%)                                    | 4(10.8%)                                    | 0.441    |
| QUESTION 5                                                         |                             |                                            |                                             |          |
| I don't feel particularly guilty                                   | 106(57.9%)                  | 36(49.3%)                                  | 14(37.8%)                                   |          |
| I feel guilty a good part of the time.                             | 49(26.8%)                   | 23(31.5%)                                  | 13(35.1%)                                   |          |
| I feel quite guilty most of the time.                              | 21(11.5%)                   | 10(13.7%)                                  | 8(21.6%)                                    |          |
| I feel guilty all of the time.                                     | 7(3.8%)                     | 4(5.5%)                                    | 2(5.4%)                                     | 0.383    |
| QUESTION 6                                                         |                             |                                            |                                             |          |
| I don't feel I am being punished.                                  | 134(73.2%)                  | 52(71.2%)                                  | 22(59.5%)                                   |          |
| I feel I may be punished.                                          | 25(13.7%)                   | 6(8.2%)                                    | 10(27%)                                     |          |
| I expect to be punished.                                           | 6(3.3%)                     | 7(9.6%)                                    | 2(5.4%)                                     |          |
| feel I am being punished.                                          | 18(9.8%)                    | 8(11%)                                     | 3(8.1%)                                     | 0.079    |
| QUESTION 7                                                         |                             |                                            |                                             |          |
| I don't feel disappointed in myself.                               | 123(67.2%)                  | 40(54.8%)                                  | 18(48.6%)                                   |          |
| I am disappointed in myself.                                       | 48(26.2%)                   | 27(37%)                                    | 17(45.9%)                                   |          |
| I am disgusted with myself.                                        | 6(3.3%)                     | 5(6.8%)                                    | 1(2.7%)                                     |          |
| I hate myself.                                                     | 6(3.3%)                     | 1(1.4%)                                    | 1(2.7%)                                     | 0.134    |
| QUESTION 8                                                         |                             |                                            |                                             |          |
| I don't feel I am any worse than anybody else.                     |                             |                                            |                                             |          |
| I am critical of myself for my weaknesses or mistakes.             | 32(17.5%)                   | 7(9.6%)                                    | 3(8.1%)                                     |          |
| I blame myself all the time for my faults.                         | 134(73.2%)                  | 57(78.1%)                                  | 30(81.1%)                                   |          |
| I blame myself for everything bad that happens.                    | 14(7.7%)                    | 5(6.8%)                                    | 2(5.4%)                                     |          |
|                                                                    | 3(1.6%)                     | 4(5.5%)                                    | 2(5.4%)                                     | 0.299    |
| QUESTION 9                                                         |                             |                                            |                                             |          |
| I don't have any thoughts of killing myself.                       |                             |                                            |                                             |          |
| I have thoughts of killing myself, but I would not carry them out. | 171(93.4%)                  | 64(87.7%)                                  | 33(89.2%)                                   |          |
| I would like to kill myself.                                       | 11(6%)                      | 8(11%)                                     | 3(8.1%)                                     |          |
|                                                                    | 0                           | 1(1.4%)                                    | 1(2.7%)                                     |          |
| I would kill myself if I had the chance.                           | 1(0.5%)                     | 0                                          | 0                                           | 0.369    |

|                                                                                                                                                                                                                                                                                                                                  |                                                 |                                                  |                                               |         |
|----------------------------------------------------------------------------------------------------------------------------------------------------------------------------------------------------------------------------------------------------------------------------------------------------------------------------------|-------------------------------------------------|--------------------------------------------------|-----------------------------------------------|---------|
| QUESTION 10<br>I don't cry any more than usual.<br>I cry more now than I used to.<br>I cry all the time now.<br>used to be able to cry, but now I can't cry even though I want to                                                                                                                                                | 104(56.8%)<br>67(36.6%)<br>5(2.7%)<br>7(3.8%)   | 28(38.4%)<br>38(52.1%)<br>1(1.4%)<br>6(8.2%)     | 22(59.5%)<br>11(29.7%)<br>1(2.7%)<br>3(8.1%)  | 0.096   |
| QUESTION 11<br>I am no more irritated by things than I ever was.<br>I am slightly more irritated now than usual.<br>I am quite annoyed or irritated a good deal of the time.<br>I feel irritated all the time.                                                                                                                   | 59(32.2%)<br>83(45.4%)<br>39(21.3%)<br>2(1.1%)  | 19(26%)<br>29(39.7%)<br>25(34.2%)<br>0           | 16(43.2%)<br>14(37.8%)<br>6(16.2%)<br>1(2.7%) | 0.153   |
| QUESTION 12<br>I have not lost interest in other people.<br>I am less interested in other people than I used to be.<br>I have lost most of my interest in other people.<br>I have lost all of my interest in other people                                                                                                        | 89(48.6%)<br>77(42.1%)<br>16(8.7%)<br>1(0.5%)   | 25(34.2%)<br>32(43.8%)<br>15(20.5%)<br>1(1.4%)   | 20(54.1%)<br>12(32.4%)<br>5(13.5%)<br>0       | 0.101   |
| QUESTION 13<br>I make decisions about as well as I ever could.<br>I put off making decisions more than I used to.<br>I have greater difficulty in making decisions more than I used to.<br>I can't make decisions at all anymore.                                                                                                | 117(63.9%)<br>37(20.2%)<br>25(13.7%)<br>4(2.2%) | 38(52.1%)<br>21(28.8%)<br>12(16.4%)<br>2(2.7%)   | 20(54.1%)<br>12(32.4%)<br>3(8.1%)<br>2(5.4%)  | 0.343   |
| QUESTION 14<br>I don't feel that I look any worse than I used to.<br>I am worried that I am looking old or unattractive.<br>I feel there are permanent changes in my appearance that make me look unattractive<br>believe that I look ugly.                                                                                      | 104(56.8%)<br>48(26.2%)<br>15(8.2%)<br>16(8.7%) | 29(39.7%)<br>16(21.9%)<br>16(21.9%)<br>12(16.4%) | 16(43.2%)<br>5(13.5%)<br>13(35.1%)<br>3(8.1%) | <0.001* |
| QUESTION 15<br>I can work about as well as before.<br>It takes an extra effort to get started at doing something.<br>I have to push myself very hard to do anything.<br>I can't do any work at all.                                                                                                                              | 69(37.7%)<br>80(43.7%)<br>33(18%)<br>1(0.5%)    | 16(21.9%)<br>32(43.8%)<br>25(34.2%)<br>0         | 12(32.4%)<br>16(43.2%)<br>7(18.9%)<br>2(5.4%) | 0.005*  |
| QUESTION 16<br>I can sleep as well as usual.<br>I don't sleep as well as I used to.<br>I wake up 1-2 hours earlier than usual and find it hard to get back to sleep.<br>I wake up several hours earlier than I used to and cannot get back to sleep.                                                                             | 89(48.6%)<br>69(37.7%)<br>20(10.9%)<br>5(2.7%)  | 16(21.9%)<br>31(42.5%)<br>18(24.7%)<br>8(11%)    | 10(27%)<br>18(48.6%)<br>7(18.9%)<br>2(5.4%)   | <0.001* |
| QUESTION 17<br>I don't get more tired than usual.<br>I get tired more easily than I used to.<br>I get tired from doing almost anything.<br>I am too tired to do anything.                                                                                                                                                        | 49(26.8%)<br>110(60.1%)<br>21(11.5%)<br>3(1.6%) | 14(19.2%)<br>46(63%)<br>9(12.3%)<br>4(5.5%)      | 7(18.9%)<br>22(59.5%)<br>4(10.8%)<br>4(10.8%) | 0.147   |
| QUESTION 18<br>-My appetite is no worse than usual.<br>My appetite is not as good as it used to be.<br>My appetite is much worse now.<br>have no appetite at all anymore                                                                                                                                                         | 141(77%)<br>35(19.1%)<br>7(3.8%)<br>0           | 37(50.7%)<br>29(39.7%)<br>6(8.2%)<br>1(1.4%)     | 37(50.7%)<br>29(39.7%)<br>6(8.2%)<br>1(1.4%)  | <0.001* |
| QUESTION 19<br>I haven't lost much weight, if any, lately.<br>I have lost more than five pounds.<br>I have lost more than ten pounds.<br>I have lost more than fifteen pounds.                                                                                                                                                   | 145(79.2%)<br>31(16.9%)<br>6(3.3%)<br>1(0.5%)   | 49(67.1%)<br>17(23.3%)<br>4(5.5%)<br>3(4.1%)     | 29(78.4%)<br>4(10.8%)<br>2(5.4%)<br>2(5.4%)   | 0.137   |
| QUESTION 20<br>I am no more worried about my health than usual.<br>I am worried about physical problems like aches, pains, upset stomach, or constipation.<br>I am very worried about physical problems and it's hard to think of much else.<br>I am so worried about my physical problems that I cannot think of anything else. | 124(67.8%)<br>51(27.9%)<br>6(3.3%)<br>2(1.1%)   | 42(57.5%)<br>23(31.5%)<br>7(9.6%)<br>1(1.4%)     | 25(67.6%)<br>11(29.7%)<br>1(2.7%)<br>0        | 0.388   |

|                                                                              |            |            |            |        |
|------------------------------------------------------------------------------|------------|------------|------------|--------|
| QUESTION 21<br>. I have not noticed any recent change in my interest in sex. | 126(68.9%) | 42(57.5%)  | 24(64.9%)  | 0.662  |
| I am less interested in sex than I used to be.                               | 49(26.8%)  | 26(35.6%)  | 10(27%)    |        |
| I have almost no interest in sex.                                            | 5(2.7%)    | 4(5.5%)    | 2(5.4%)    |        |
| I have lost interest in sex completely.                                      | 3(1.6%)    | 1(1.4%)    | 1(2.7%)    |        |
| 22. I tried not to talk about it. them.                                      |            |            |            | 0.017* |
| - none                                                                       | 71 (38.8%) | 19 (26%)   | 7 (18.9%)  |        |
| -not much                                                                    | 44 (24.0%) | 11 (15.1%) | 15 (40.5%) |        |
| -moderately                                                                  | 37 (20.2%) | 24 (32.9%) | 7 (18.9%)  |        |
| -enough                                                                      | 20 (10.9%) | 14 (19.2%) | 6 (16.2%)  |        |
| -extremely                                                                   | 11 (6.0%)  | 5 (6.8%)   | 2 (5.4%)   |        |

**B IN THE LAST YEAR HOW OFTEN ALTERATION OF MENSTRUAL CYCLE**

| PATIENTS n.293 (100%)                                                                   | 21-35 D<br>(260 / 88.7%) | >35 D<br>(29/9.9%)     | <21D<br>(4/1.4%)      | P      |
|-----------------------------------------------------------------------------------------|--------------------------|------------------------|-----------------------|--------|
| QUESTION 1<br>do not feel sad.                                                          | 107 (41.2%)              | 8(27.6%)               | 0                     | 0.011* |
| feel sad                                                                                | 121(46.5%)               | 14(48.3%)              | 4 (100%)              |        |
| -I am sad all the time and I can't snap out of it                                       | 29(11.2%)                | 4(13.8%)               | 0                     |        |
| I am so sad and unhappy that I can't stand it                                           | 3(1.2%)                  | 3(10.3%)               | 0                     |        |
| QUESTION 3<br>I do not feel like a failure                                              |                          |                        |                       | 0.001* |
| I feel I have failed more than the average person.                                      | 173(66.5%)               | 19(65.5%)              | 1(25%)                |        |
| As I look back on my life, all I can see is a lot of failures.                          | 62(23.8%)                | 6(20.7%)               | 0                     |        |
| I feel I am a complete failure as a person.                                             | 15(5.8%)<br>10(3.8%)     | 2(6.9%)<br>2(6.9%)     | 1(25%)<br>2(50%)      |        |
| QUESTION 5<br>I don't feel particularly guilty                                          | 143(55%)                 | 13(44.8%)              | 0                     | 0.015* |
| I feel guilty a good part of the time.                                                  | 73(28.1%)                | 11(37.9%)              | 1(25%)                |        |
| I feel quite guilty most of the time.                                                   | 33(12.7%)                | 3(10.3%)               | 3(75%)                |        |
| I feel guilty all of the time.                                                          | 11(4.2%)                 | 2(6.9%)                | 0                     |        |
| QUESTION 9<br>I don't have any thoughts of killing myself.                              |                          |                        |                       | 0.005* |
| I have thoughts of killing myself, but I would not carry them out.                      | 239(91.9%)<br>20(7.7%)   | 25(86.2%)<br>2(6.9%)   | 4(100%)<br>0          |        |
| I would like to kill myself.                                                            | 0                        | 2(6.9%)                | 0                     |        |
| I would kill myself if I had the chance.                                                | 1(0.4%)                  | 0                      | 0                     |        |
| QUESTION 12<br>I have not lost interest in other people.                                | 126(48.5%)               | 5(17.2%)               | 3(75%)                | 0.002* |
| I am less interested in other people than I used to be.                                 | 106(40.8%)               | 14(48.3%)              | 1(25%)                |        |
| I have lost most of my interest in other people.                                        | 26(10%)                  | 10(34.5%)              | 0                     |        |
| I have lost all of my interest in other people                                          | 2(0.8%)                  | 0                      | 0                     |        |
| QUESTION 14<br>I don't feel that I look any worse than I used to.                       |                          |                        |                       | 0.005* |
| I am worried that I am looking old or unattractive.                                     | 69(37.7%)                | 16(21.9%)              | 12(32.4%)             |        |
| I feel there are permanent changes in my appearance that make me look unattractive      | 80(43.7%)<br>33(18%)     | 32(43.8%)<br>25(34.2%) | 16(43.2%)<br>7(18.9%) |        |
| believe that I look ugly.                                                               | 1(0.5%)                  | 0                      | 2(5.4%)               |        |
| QUESTION 16<br>I can sleep as well as usual.                                            |                          |                        |                       | 0.048* |
| I don't sleep as well as I used to.                                                     |                          |                        |                       |        |
| I wake up 1-2 hours earlier than usual and find it hard to get back to sleep.           | 108(41.5%)<br>105(40.4%) | 5(17.2%)<br>12(41.4%)  | 2(50%)<br>1(25%)      |        |
| I wake up several hours earlier than I used to and cannot get back to sleep.            | 34(13.1%)<br>13(5%)      | 10(34.5%)<br>2(6.9%)   | 1(25%)<br>0           |        |
| QUESTION 20<br>I am no more worried about my health than usual.                         |                          |                        |                       | 0.003* |
| I am worried about physical problems like aches, pains, upset stomach, or constipation. |                          |                        |                       |        |
| I am very worried about physical problems and it's hard to think of much else.          | 170(65.4%)<br>78(30%)    | 20(69%)<br>4(13.8%)    | 1(25%)<br>3(75)       |        |
| I am so worried about my physical problems that I cannot think of anything else.        | 11(4.2%)<br>1(0.4%)      | 3(10.3%)<br>2(6.9%)    | 0<br>0                |        |
| QUESTION 21<br>. I have not noticed any recent change in my interest in sex.            | 177(68.1%)               | 12(41.4%)              | 3(75%)                | 0.003* |
| I am less interested in sex than I used to be.                                          | 72(27.7%)                | 12(41.4%)              | 1(25%)                |        |
| I have almost no interest in sex.                                                       | 9(3.5%)                  | 2(6.9%)                | 0                     |        |
| I have lost interest in sex completely.                                                 | 2(0.8%)                  | 3(10.3%)               | 0                     |        |

C

## IN THE LAST YEAR AMENORRHEA

| PATIENTS n.293 (100%)                                                                                                                                                                                                             | NO<br>270 (92.2%)                                | YES<br>23 (7.8%)                             | P       |
|-----------------------------------------------------------------------------------------------------------------------------------------------------------------------------------------------------------------------------------|--------------------------------------------------|----------------------------------------------|---------|
| QUESTION 1<br>I do not feel sad.<br>I feel sad<br>I am sad all the time and I can't snap out of it<br>I am so sad and unhappy that I can't stand it                                                                               | 110(40.7%)<br>127(47%)<br>30(11.1%)<br>3(1.1%)   | 5(21.7%)<br>12(52.2%)<br>3(13%)<br>3(13%)    | <0.001* |
| QUESTION 2<br>I am not particularly discouraged about the future<br>I feel discouraged about the future.<br>I feel I have nothing to look forward to.<br>I feel the future is hopeless and that things cannot improve             | 123(45.6%)<br>115(42.6%)<br>23(8.5%)<br>9(3.3%)  | 8(34.8%)<br>10(43.5%)<br>4(17.4%)<br>1(4.3%) | 0.488   |
| QUESTION 3<br>I do not feel like a failure<br>I feel I have failed more than the average person.<br>As I look back on my life, all I can see is a lot of failures.<br>I feel I am a complete failure as a person.                 | 180(66.7%)<br>61(22.6%)<br>17(6.3%)<br>12(4.4%)  | 13(56.5%)<br>7(30.4%)<br>1(4.3%)<br>2(8.7%)  | 0.609   |
| QUESTION 4<br>I get as much satisfaction out of things as I used to.<br>I don't enjoy things the way I used to.<br>I don't get real satisfaction out of anything anymore.<br>I am dissatisfied or bored with everything           | 87(32.2%)<br>139(51.5%)<br>19(7%)<br>25(9.3%)    | 5(21.7%)<br>12(52.2%)<br>4(17.4%)<br>2(8.7%) | 0.302   |
| QUESTION 5<br>I don't feel particularly guilty<br>I feel guilty a good part of the time.<br>I feel quite guilty most of the time.<br>I feel guilty all of the time.                                                               | 142(52.6%)<br>80(29.6%)<br>36(13.3%)<br>12(4.4%) | 14(60.9%)<br>5(21.7%)<br>3(13%)<br>1(4.3%)   | 0.863   |
| QUESTION 6<br>I don't feel I am being punished.<br>I feel I may be punished.<br>I expect to be punished.<br>I feel I am being punished.                                                                                           | 195(72.2%)<br>35(13%)<br>14(5.2%)<br>26(9.6%)    | 13(56.5%)<br>6(26.1%)<br>1(4.3%)<br>3(13%)   | 0.305   |
| QUESTION 7<br>I don't feel disappointed in myself.<br>I am disappointed in myself.<br>I am disgusted with myself.<br>I hate myself.                                                                                               | 173(64.1%)<br>79(29.3%)<br>10(3.7%)<br>8(3%)     | 8(34.8%)<br>13(56.5%)<br>2(8.7%)<br>0        | 0.019*  |
| QUESTION 8<br>I don't feel I am any worse than anybody else.<br>I am critical of myself for my weaknesses or mistakes.<br>I blame myself all the time for my faults.<br>I blame myself for everything bad that happens.           | 39(14.4%)<br>204(75.6%)<br>18(6.7%)<br>9(3.3%)   | 3(13%)<br>17(73.9%)<br>3(13%)<br>0           | 0.571   |
| QUESTION 9<br>I don't have any thoughts of killing myself.<br>I have thoughts of killing myself, but I would not carry them out.<br>I would like to kill myself.<br>I would kill myself if I had the chance.                      | 250(92.6%)<br>18(6.7%)<br>1(0.4%)<br>1(0.4%)     | 18(78.3%)<br>4(17.4%)<br>1(4.3%)<br>0        | 0.033*  |
| QUESTION 10<br>I don't cry any more than usual.<br>I cry more now than I used to.<br>I cry all the time now.<br>I used to be able to cry, but now I can't cry even though I want to                                               | 144(53.3%)<br>108(40.0%)<br>6(2.2%)<br>12(4.4%)  | 10(43.5%)<br>8(34.8%)<br>1(4.3%)<br>4(17.4%) | 0.591   |
| QUESTION 11<br>I am no more irritated by things than I ever was.<br>I am slightly more irritated now than usual.<br>I am quite annoyed or irritated a good deal of the time.<br>I feel irritated all the time.                    | 87(32.2%)<br>118(43.7%)<br>63(23.3%)<br>2(0.7%)  | 7(30.4%)<br>8(34.8%)<br>7(30.4%)<br>1(4.3%)  | 0.314   |
| QUESTION 12<br>I have not lost interest in other people.<br>I am less interested in other people than I used to be.<br>I have lost most of my interest in other people.<br>I have lost all of my interest in other people         | 125(46.3%)<br>114(42.2%)<br>29(10.7%)<br>2(0.7%) | 9(39.1%)<br>7(30.4%)<br>7(30.4%)<br>0        | 0.050*  |
| QUESTION 13<br>I make decisions about as well as I ever could.<br>I put off making decisions more than I used to.<br>I have greater difficulty in making decisions more than I used to.<br>I can't make decisions at all anymore. | 166(61.5%)<br>62(23%)<br>36(13.3%)<br>6(2.2%)    | 9(39.1%)<br>8(34.8%)<br>4(17.4%)<br>2(8.7%)  | 0.089   |

|                                                                                                                                                                                                                                                                                                                                  |                                                   |                                              |         |
|----------------------------------------------------------------------------------------------------------------------------------------------------------------------------------------------------------------------------------------------------------------------------------------------------------------------------------|---------------------------------------------------|----------------------------------------------|---------|
| QUESTION 14<br>I don't feel that I look any worse than I used to.<br>I am worried that I am looking old or unattractive.<br>I feel there are permanent changes in my appearance that make me look unattractive believe that I look ugly.                                                                                         | 142(52.6%)<br>64(23.7%)<br>37(13.7%)<br>27(10%)   | 7(30.4%)<br>5(21.7%)<br>7(30.4%)<br>4(17.4%) | 0.068   |
| QUESTION 15<br>I can work about as well as before.<br>It takes an extra effort to get started at doing something.<br>I have to push myself very hard to do anything.<br>I can't do any work at all.                                                                                                                              | 92(34.1%)<br>119(44.1%)<br>57(21.1%)<br>2(0.7%)   | 5(21.7%)<br>9(39.1%)<br>8(34.8%)<br>1(4.3%)  | 0.134   |
| QUESTION 16<br>I can sleep as well as usual.<br>I don't sleep as well as I used to.<br>I wake up 1-2 hours earlier than usual and find it hard to get back to sleep.<br>I wake up several hours earlier than I used to and cannot get back to sleep.                                                                             | 112(41.5%)<br>114(42.2%)<br>32(11.9%)<br>12(4.4%) | 3(13.0%)<br>4(17.4%)<br>13(56.5%)<br>3(13%)  | <0.001* |
| QUESTION 17<br>I don't get more tired than usual.<br>I get tired more easily than I used to.<br>I get tired from doing almost anything.<br>I am too tired to do anything.                                                                                                                                                        | 65(24.1%)<br>164(60.7%)<br>30(11.1%)<br>11(4.1%)  | 5(21.7%)<br>14(60.9%)<br>4(17.4%)<br>0       | 0.636   |
| QUESTION 18<br>-My appetite is no worse than usual.<br>My appetite is not as good as it used to be.<br>My appetite is much worse now.<br>I have no appetite at all anymore                                                                                                                                                       | 188(69.6%)<br>67(24.8%)<br>14(5.2%)<br>1(0.4%)    | 11(47.8%)<br>12(52.2%)<br>0<br>0             | 0.034*  |
| QUESTION 19<br>I haven't lost much weight, if any, lately.<br>I have lost more than five pounds.<br>I have lost more than ten pounds.<br>I have lost more than fifteen pounds.                                                                                                                                                   | 209(77.4%)<br>45(16.7%)<br>11(4.1%)<br>5(1.9%)    | 14(60.9%)<br>7(30.4%)<br>1(4.3%)<br>1(4.3%)  | 0.299   |
| QUESTION 20<br>I am no more worried about my health than usual.<br>I am worried about physical problems like aches, pains, upset stomach, or constipation.<br>I am very worried about physical problems and it's hard to think of much else.<br>I am so worried about my physical problems that I cannot think of anything else. | 178(65.9%)<br>78(28.9%)<br>12(4.4%)<br>2(0.7%)    | 13(56.5%)<br>7(30.4%)<br>2(8.7%)<br>1(4.3%)  | 0.284   |
| QUESTION 21<br>I have not noticed any recent change in my interest in sex.<br>I am less interested in sex than I used to be.<br>I have almost no interest in sex.<br>I have lost interest in sex completely.                                                                                                                     | 178(65.9%)<br>80(29.6%)<br>8(3%)<br>4(1.5%)       | 14(60.9%)<br>5(21.7%)<br>3(13%)<br>1(4.3%)   | 0.063   |

**D**

**IN THE LAST YEAR CHANGE WEIGHT**

| PATIENTS n.293 (100%)                                                                                                                                                                                                 | No<br>(132 / 45.1%)                          | Increase<br>(86/29.4%)                         | Reduction<br>(75/25.6%)                      | P     |
|-----------------------------------------------------------------------------------------------------------------------------------------------------------------------------------------------------------------------|----------------------------------------------|------------------------------------------------|----------------------------------------------|-------|
| QUESTION 1<br>Do not feel sad.<br>I feel sad.<br>I am sad all the time and I can't snap out of it.<br>I am so sad and unhappy that I can't stand it.                                                                  | 51(38.6%)<br>66(50%)<br>15(11.4%)<br>0       | 39(45.3%)<br>34(39.5%)<br>11(12.8%)<br>2(2.3%) | 25(33.3%)<br>39(52%)<br>7(9.3%)<br>4(5.3%)   | 0.114 |
| QUESTION 2<br>I am not particularly discouraged about the future<br>I feel discouraged about the future.<br>I feel I have nothing to look forward to.<br>I feel the future is hopeless and that things cannot improve | 56(42.4%)<br>61(46.2%)<br>9(6.8%)<br>6(4.5%) | 42(48.8%)<br>30(34.9%)<br>11(12.8%)<br>3(3.5%) | 33(44%)<br>34(45.3%)<br>7(9.3%)<br>1(1.3%)   | 0.459 |
| QUESTION 3<br>I do not feel like a failure<br>I feel I have failed more than the average person.<br>As I look back on my life, all I can see is a lot of failures.                                                    | 88(66.7%)<br>32(24.2%)<br>5(3.8%)<br>7(5.3%) | 53(61.6%)<br>20(23.3%)<br>8(9.3%)<br>5(5.8%)   | 52(69.3%)<br>16(21.3%)<br>5(6.7%)<br>2(2.7%) | 0.656 |



|                                                                                     |            |           |           |          |
|-------------------------------------------------------------------------------------|------------|-----------|-----------|----------|
| I feel I am a complete failure as a person.                                         |            |           |           |          |
| QUESTION 4                                                                          |            |           |           |          |
| I get as much satisfaction out of things as I used to.                              |            |           |           |          |
| I don't enjoy things the way I used to.                                             | 44(33.3%)  | 25(29.1%) | 23(30.7%) |          |
| I don't get real satisfaction out of anything anymore.                              | 67(50.8%)  | 44(51.2%) | 40(53.3%) |          |
|                                                                                     | 8(6.1%)    | 11(12.8%) | 4(5.3%)   |          |
| I am dissatisfied or bored with everything                                          | 13(9.8%)   | 6(7%)     | 8(10.7%)  | 0.557    |
| QUESTION 5                                                                          |            |           |           |          |
| I don't feel particularly guilty                                                    | 72(54.5%)  | 45(52.3%) | 39(52%)   |          |
| I feel guilty a good part of the time.                                              | 36(27.3%)  | 23(26.7%) | 26(34.7%) |          |
| I feel quite guilty most of the time.                                               | 18(13.6%)  | 13(15.1%) | 8(10.7%)  |          |
| I feel guilty all of the time.                                                      | 6(4.5%)    | 5(5.8%)   | 2(2.7%)   | 0.844    |
| QUESTION 6                                                                          |            |           |           |          |
| I don't feel I am being punished.                                                   | 96(72.7%)  | 57(66.3%) | 55(73.3%) |          |
| I feel I may be punished.                                                           | 16(12.1%)  | 12(14%)   | 13(17.3%) |          |
| I expect to be punished.                                                            | 7(5.3%)    | 7(8.1%)   | 1(1.3%)   |          |
| feel I am being punished.                                                           | 13(9.8%)   | 10(11.6%) | 6(8%)     | 0.483    |
| QUESTION 7                                                                          |            |           |           |          |
| I don't feel disappointed in myself.                                                | 85(64.4%)  | 44(51.2%) | 52(69.3%) |          |
| I am disappointed in myself.                                                        | 38(28.8%)  | 37(43%)   | 17(22.7%) |          |
| I am disgusted with myself.                                                         | 5(3.8%)    | 3(3.5%)   | 4(5.3%)   |          |
| I hate myself.                                                                      | 4(3%)      | 2(2.3%)   | 2(2.7%)   | 0.191    |
| QUESTION 8                                                                          |            |           |           |          |
| I don't feel I am any worse than anybody else.                                      | 17(12.9%)  | 12(14%)   | 13(17.3%) |          |
| I am critical of myself for my weaknesses or mistakes.                              | 98(74.2%)  | 68(79.1%) | 55(73.3%) |          |
| I blame myself all the time for my faults.                                          | 11(8.3%)   | 5(5.8%)   | 5(6.7%)   |          |
| I blame myself for everything bad that happens.                                     | 6(4.5%)    | 1(1.2%)   | 2(2.7%)   | 0.759    |
| QUESTION 9                                                                          |            |           |           |          |
| I don't have any thoughts of killing myself.                                        |            |           |           |          |
| I have thoughts of killing myself, but I would not carry them out.                  | 121(91.7%) | 76(88.4%) | 71(94.7%) |          |
|                                                                                     | 11(8.3%)   | 7(8.1%)   | 4(5.3%)   |          |
| I would like to kill myself.                                                        | 0          | 2(2.3%)   | 0         |          |
| I would kill myself if I had the chance.                                            | 0          | 1(1.2%)   | 0         | 0.236    |
| QUESTION 10                                                                         |            |           |           |          |
| I don't cry any more than usual.                                                    |            |           |           |          |
| I cry more now than I used to.                                                      | 73(55.3%)  | 46(53.5%) | 35(46.7%) |          |
| I cry all the time now.                                                             | 52(39.4%)  | 31(36%)   | 33(44%)   |          |
| used to be able to cry, but now I can't cry even though I want to                   | 2(1.5%)    | 2(2.3%)   | 3(4%)     |          |
|                                                                                     | 5(3.8%)    | 7(8.1%)   | 4(5.3%)   | 0.624    |
| QUESTION 11                                                                         |            |           |           |          |
| I am no more irritated by things than I ever was.                                   |            |           |           |          |
| I am slightly more irritated now than usual.                                        | 47(35.6%)  | 28(32.6%) | 19(25.3%) |          |
| I am quite annoyed or irritated a good deal of the time.                            | 57(43.2%)  | 37(43%)   | 32(42.7%) |          |
|                                                                                     | 27(20.5%)  | 19(22.1%) | 24(32%)   |          |
| I feel irritated all the time.                                                      | 1(0.8%)    | 2(2.3%)   | 0         | 0.349    |
| QUESTION 12                                                                         |            |           |           |          |
| I have not lost interest in other people.                                           |            |           |           |          |
| I am less interested in other people than I used to be.                             | 69(52.3%)  | 37(43%)   | 28(37.3%) |          |
|                                                                                     | 48(36.4%)  | 40(46.5%) | 33(44%)   |          |
| I have lost most of my interest in other people.                                    | 15(11.4%)  | 7(8.1%)   | 14(18.7%) |          |
| I have lost all of my interest in other people                                      | 0          | 2(2.3%)   | 0         | 0.050*   |
| QUESTION 13                                                                         |            |           |           |          |
| I make decisions about as well as I ever could.                                     |            |           |           |          |
| I put off making decisions more than I used to.                                     | 84(63.6%)  | 44(51.2%) | 47(62.7%) |          |
| I have greater difficulty in making decisions more than I used to.                  | 31(23.5%)  | 24(27.9%) | 15(20%)   |          |
|                                                                                     | 14(10.6%)  | 16(18.6%) | 10(13.3%) |          |
| I can't make decisions at all anymore.                                              | 3(2.3%)    | 2(2.3%)   | 3(4%)     | 0.468    |
| QUESTION 14                                                                         |            |           |           |          |
| I don't feel that I look any worse than I used to.                                  |            |           |           |          |
| I am worried that I am looking old or unattractive.                                 | 78(59.1%)  | 30(34.9%) | 41(54.7%) |          |
| I feel there are permanent changes in my appearance that make me look unattractive. | 25(18.9%)  | 27(31.4%) | 17(22.7%) |          |
|                                                                                     | 11(8.3%)   | 23(26.7%) | 10(13.3%) |          |
| believe that I look ugly.                                                           | 18(13.6%)  | 6(7%)     | 7(9.3%)   | < 0.001* |

|                                                                                                                                                                                                                                                                                                                                  |                                               |                                                |                                                |          |
|----------------------------------------------------------------------------------------------------------------------------------------------------------------------------------------------------------------------------------------------------------------------------------------------------------------------------------|-----------------------------------------------|------------------------------------------------|------------------------------------------------|----------|
| QUESTION 15<br>I can work about as well as before.<br>It takes an extra effort to get started at doing something.<br>I have to push myself very hard to do anything.<br>I can't do any work at all.                                                                                                                              | 53(40.2%)<br>56(42.4%)<br>23(17.4%)<br>0      | 21(24.4%)<br>38(44.2%)<br>25(29.1%)<br>2(2.3%) | 23(30.7%)<br>34(45.3%)<br>17(22.7%)<br>1(1.3%) | 0.116    |
| QUESTION 16<br>I can sleep as well as usual.<br>I don't sleep as well as I used to.<br>I wake up 1-2 hours earlier than usual and find it hard to get back to sleep.<br>I wake up several hours earlier than I used to and cannot get back to sleep.                                                                             | 63(47.7%)<br>51(38.6%)<br>12(9.1%)<br>6(4.5%) | 29(33.7%)<br>35(40.7%)<br>18(20.9%)<br>4(4.7%) | 23(30.7%)<br>32(42.7%)<br>15(20%)<br>5(6.7%)   | 0.079    |
| QUESTION 17<br>I don't get more tired than usual.<br>I get tired more easily than I used to.<br>I get tired from doing almost anything.<br>I am too tired to do anything.                                                                                                                                                        | 34(25.8%)<br>82(62.1%)<br>12(9.1%)<br>4(3%)   | 17(19.8%)<br>52(60.5%)<br>11(12.8%)<br>6(7%)   | 19(25.3%)<br>44(58.7%)<br>11(14.7%)<br>1(1.3%) | 0.409    |
| QUESTION 18<br>My appetite is no worse than usual.<br>My appetite is not as good as it used to be.<br>My appetite is much worse now.<br>I have no appetite at all anymore.                                                                                                                                                       | 104(78.8%)<br>23(17.4%)<br>5(3.8%)<br>0       | 56(65.1%)<br>23(26.7%)<br>7(8.1%)<br>0         | 39(52%)<br>33(44%)<br>2(2.7%)<br>1(1.3%)       | < 0.001* |
| QUESTION 19<br>I haven't lost much weight, if any, lately.<br>I have lost more than five pounds.<br>I have lost more than ten pounds.<br>I have lost more than fifteen pounds.                                                                                                                                                   | 118(89.4%)<br>13(9.8%)<br>0<br>1(0.8%)        | 78(90.7%)<br>5(5.8%)<br>2(2.3%)<br>1(1.2%)     | 27(36%)<br>34(45.3%)<br>10(13.3%)<br>4(5.3%)   | < 0.001* |
| QUESTION 20<br>I am no more worried about my health than usual.<br>I am worried about physical problems like aches, pains, upset stomach, or constipation.<br>I am very worried about physical problems and it's hard to think of much else.<br>I am so worried about my physical problems that I cannot think of anything else. | 86(65.2%)<br>36(27.3%)<br>8(6.1%)<br>2(1.5%)  | 59(68.6%)<br>26(30.2%)<br>1(1.2%)<br>0         | 46(61.3%)<br>23(30.7%)<br>5(6.7%)<br>1(1.3%)   | 0.518    |
| QUESTION 21<br>I have not noticed any recent change in my interest in sex.<br>I am less interested in sex than I used to be.<br>I have almost no interest in sex.<br>I have lost interest in sex completely.                                                                                                                     | 85(64.4%)<br>40(30.3%)<br>4(3%)<br>3(2.3%)    | 57(66.3%)<br>25(29.1%)<br>3(3.5%)<br>1(1.2%)   | 50(66.7%)<br>20(26.7%)<br>4(5.3%)<br>1(1.3%)   | 0.964    |

E

IN THE LAST YEAR PREMENSTRUAL SYNDROME

| PATIENTS n.293 (100%)                                                                                                                                                                                                 | NO<br>(138 / 47.1%)                          | YES<br>(155/52.9%)                             | P      |
|-----------------------------------------------------------------------------------------------------------------------------------------------------------------------------------------------------------------------|----------------------------------------------|------------------------------------------------|--------|
| QUESTION 1<br>do not feel sad.<br>feel sad<br>-I am sad all the time and I can't snap out of it<br>I am so sad and unhappy that I can't stand it                                                                      | 64(46.4%)<br>65(47.1%)<br>7(5.1%)<br>2(1.4%) | 51(32.9%)<br>74(47.7%)<br>26(16.8%)<br>4(2.6%) | 0.005* |
| QUESTION 2<br>I am not particularly discouraged about the future<br>I feel discouraged about the future.<br>I feel I have nothing to look forward to.<br>I feel the future is hopeless and that things cannot improve | 65(47.1%)<br>61(44.2%)<br>11(8%)<br>1(0.7%)  | 66(42.6%)<br>64(41.3%)<br>16(10.3%)<br>9(5.8%) | 0.092  |
| QUESTION 3<br>I do not feel like a failure<br>I feel I have failed more than the average person.<br>As I look back on my life, all I can see is a lot of failures.<br>I feel I am a complete failure as a person.     | 98(71%)<br>30(21.7%)<br>5(3.6%)<br>5(3.6%)   | 95(61.3%)<br>38(24.5%)<br>13(8.4%)<br>9(5.8%)  | 0.194  |

|                                                                                                                                                                                                                                                             |                                                          |                                                            |        |
|-------------------------------------------------------------------------------------------------------------------------------------------------------------------------------------------------------------------------------------------------------------|----------------------------------------------------------|------------------------------------------------------------|--------|
| <p>QUESTION 4</p> <p>I get as much satisfaction out of things as I used to.<br/>I don't enjoy things the way I used to.<br/>I don't get real satisfaction out of anything anymore.<br/>I am dissatisfied or bored with everything</p>                       | <p>46(33.3%)<br/>75(54.3%)<br/>4(2.9%)<br/>13(9.4%)</p>  | <p>46(29.7%)<br/>76(49%)<br/>19(12.3%)<br/>14(9%)</p>      | 0.031* |
| <p>QUESTION 5</p> <p>I don't feel particularly guilty<br/>I feel guilty a good part of the time.<br/>I feel quite guilty most of the time.<br/>I feel guilty all of the time.</p>                                                                           | <p>81(58.7%)<br/>39(28.3%)<br/>11(8%)<br/>7(5.1%)</p>    | <p>75(48.4%)<br/>46(29.7%)<br/>28(18.1%)<br/>6(3.9%)</p>   | 0.062  |
| <p>QUESTION 6</p> <p>I don't feel I am being punished.<br/>I feel I may be punished.<br/>I expect to be punished.<br/>I feel I am being punished.</p>                                                                                                       | <p>98(71%)<br/>24(17.4%)<br/>3(2.2%)<br/>13(9.4%)</p>    | <p>110(71%)<br/>17(11%)<br/>12(7.7%)<br/>16(10.3%)</p>     | 0.085  |
| <p>QUESTION 7</p> <p>I don't feel disappointed in myself.<br/>I am disappointed in myself.<br/>I am disgusted with myself.<br/>I hate myself.</p>                                                                                                           | <p>95(68.8%)<br/>37(26.8%)<br/>3(2.2%)<br/>3(2.2%)</p>   | <p>86(55.5%)<br/>55(35.5%)<br/>9(5.8%)<br/>5(3.2%)</p>     | 0.089  |
| <p>QUESTION 8</p> <p>I don't feel I am any worse than anybody else.<br/>I am critical of myself for my weaknesses or mistakes.<br/>I blame myself all the time for my faults.<br/>I blame myself for everything bad that happens.</p>                       | <p>16(11.6%)<br/>109(79%)<br/>10(7.2%)<br/>3(2.2%)</p>   | <p>26(16.8%)<br/>112(72.3%)<br/>11(7.1%)<br/>6(3.9%)</p>   | 0.477  |
| <p>QUESTION 9</p> <p>I don't have any thoughts of killing myself.<br/>I have thoughts of killing myself, but I would not carry them out.<br/>I would like to kill myself.<br/>I would kill myself if I had the chance.</p>                                  | <p>128(92.8%)<br/>8(5.8%)<br/>1(0.7%)<br/>1(0.7%)</p>    | <p>140(90.3%)<br/>14(9%)<br/>1(0.6%)<br/>0</p>             | 0.533  |
| <p>QUESTION 10</p> <p>I don't cry any more than usual.<br/>I cry more now than I used to.<br/>I cry all the time now.<br/>I used to be able to cry, but now I can't cry even though I want to</p>                                                           | <p>82(59.4%)<br/>46(33.3%)<br/>2(1.4%)<br/>8(5.8%)</p>   | <p>72(46.5%)<br/>70(45.2%)<br/>5(3.2%)<br/>8(5.2%)</p>     | 0.115  |
| <p>QUESTION 11</p> <p>I am no more irritated by things than I ever was.<br/>I am slightly more irritated now than usual.<br/>I am quite annoyed or irritated a good deal of the time.<br/>I feel irritated all the time.</p>                                | <p>57(41.3%)<br/>52(37.7%)<br/>27(19.6%)<br/>2(1.4%)</p> | <p>37(23.9%)<br/>74(47.7%)<br/>43(27.7%)<br/>1(0.6%)</p>   | 0.011* |
| <p>QUESTION 12</p> <p>I have not lost interest in other people.<br/>I am less interested in other people than I used to be.<br/>I have lost most of my interest in other people.<br/>I have lost all of my interest in other people</p>                     | <p>64(46.4%)<br/>54(39.1%)<br/>20(14.5%)<br/>0</p>       | <p>70(45.2%)<br/>67(43.2%)<br/>16(10.3%)<br/>2(1.3%)</p>   | 0.371  |
| <p>QUESTION 13</p> <p>I make decisions about as well as I ever could.<br/>I put off making decisions more than I used to.<br/>I have greater difficulty in making decisions more than I used to.<br/>I can't make decisions at all anymore.</p>             | <p>95(68.8%)<br/>25(18.1%)<br/>15(10.9%)<br/>3(2.2%)</p> | <p>80(51.6%)<br/>45(29%)<br/>25(16.1%)<br/>5(3%)</p>       | 0.029* |
| <p>QUESTION 14</p> <p>I don't feel that I look any worse than I used to.<br/>I am worried that I am looking old or unattractive.<br/>I feel there are permanent changes in my appearance that make me look unattractive<br/>I believe that I look ugly.</p> | <p>80(58%)<br/>33(23.9%)<br/>12(8.7%)<br/>13(9.4%)</p>   | <p>69(44.5%)<br/>36(23.2%)<br/>32(20.6%)<br/>18(11.6%)</p> | 0.020* |
| <p>QUESTION 15</p> <p>I can work about as well as before.<br/>It takes an extra effort to get started at doing something.<br/>I have to push myself very hard to do anything.<br/>I can't do any work at all.</p>                                           | <p>55(39.9%)<br/>54(39.1%)<br/>28(20.3%)<br/>1(0.7%)</p> | <p>42(27.1%)<br/>74(47.7%)<br/>37(23.9%)<br/>2(1.3%)</p>   | 0.140  |

|                                                                                                                                                                                                                                                                                                                                                         |                                                                   |                                                                    |        |
|---------------------------------------------------------------------------------------------------------------------------------------------------------------------------------------------------------------------------------------------------------------------------------------------------------------------------------------------------------|-------------------------------------------------------------------|--------------------------------------------------------------------|--------|
| <p>QUESTION 16</p> <p>I can sleep as well as usual.</p> <p>I don't sleep as well as I used to.</p> <p>I wake up 1-2 hours earlier than usual and find it hard to get back to sleep.</p> <p>I wake up several hours earlier than I used to and cannot get back to sleep.</p>                                                                             | <p>62(44.9%)</p> <p>53(38.4%)</p> <p>20(14.5%)</p> <p>3(2.2%)</p> | <p>53(34.2%)</p> <p>65(41.9%)</p> <p>25(16.1%)</p> <p>12(7.7%)</p> | 0.075  |
| <p>QUESTION 17</p> <p>I don't get more tired than usual.</p> <p>I get tired more easily than I used to.</p> <p>I get tired from doing almost anything.</p> <p>I am too tired to do anything.</p>                                                                                                                                                        | <p>42(30.4%)</p> <p>81(58.7%)</p> <p>11(8%)</p> <p>4(2.9%)</p>    | <p>28(18.1%)</p> <p>97(62.6%)</p> <p>23(14.8%)</p> <p>7(4.5%)</p>  | 0.040* |
| <p>QUESTION 18</p> <p>My appetite is no worse than usual.</p> <p>My appetite is not as good as it used to be.</p> <p>My appetite is much worse now.</p> <p>have no appetite at all anymore</p>                                                                                                                                                          | <p>100(72.5%)</p> <p>33(23.9%)</p> <p>5(3.6%)</p> <p>0</p>        | <p>99(63.9%)</p> <p>46(29.7%)</p> <p>9(5.8%)</p> <p>1(0.6%)</p>    | 0.346  |
| <p>QUESTION 19</p> <p>I haven't lost much weight, if any, lately.</p> <p>I have lost more than five pounds.</p> <p>I have lost more than ten pounds.</p> <p>I have lost more than fifteen pounds.</p>                                                                                                                                                   | <p>99(71.7%)</p> <p>28(20.3%)</p> <p>6(4.3%)</p> <p>5(3.6%)</p>   | <p>124(80%)</p> <p>24(15.5%)</p> <p>6(3.9%)</p> <p>1(0.6%)</p>     | 0.186  |
| <p>QUESTION 20</p> <p>I am no more worried about my health than usual.</p> <p>I am worried about physical problems like aches, pains, upset stomach, or constipation.</p> <p>I am very worried about physical problems and it's hard to think of much else.</p> <p>I am so worried about my physical problems that I cannot think of anything else.</p> | <p>98(71%)</p> <p>35(25.4%)</p> <p>4(2.9%)</p> <p>1(0.7%)</p>     | <p>93(60%)</p> <p>50(32.3%)</p> <p>10(6.5%)</p> <p>2(1.3%)</p>     | 0.194  |
| <p>QUESTION 21</p> <p>I have not noticed any recent change in my interest in sex.</p> <p>I am less interested in sex than I used to be.</p> <p>I have almost no interest in sex.</p> <p>I have lost interest in sex completely.</p>                                                                                                                     | <p>96(69.6%)</p> <p>36(26.1%)</p> <p>4(2.9%)</p> <p>2(1.4%)</p>   | <p>96(61.9%)</p> <p>49(31.6%)</p> <p>7(4.5%)</p> <p>3(1.9%)</p>    | 0.567  |
